# Supplementary material for: CLCAs - A Family of Metalloproteases of Intriguing Phylogenetic Distribution and with Cases of Substituted Catalytic Sites
Source: PubMed Central journal article supplement (PMC3650047; doi:10.1371/journal.pone.0062272), 2013-05-09
Supplement: pone.0062272.s002.pdf [file pone.0062272.s002.pdf]

|                                                   |     |           |                     |               |              |               |           |                |       |
|---------------------------------------------------|-----|-----------|---------------------|---------------|--------------|---------------|-----------|----------------|-------|
| gi_110611231_Homo_sapiens_I25-K262                | IQL | NNNGYEG   | IVVAIDPNVPE         | X(02)         | TLIQQIK      | DMVTQASLY     | LFE       | ATGKR          |       |
| gi_5729769_Homo_sapiens_V33-A262                  | VQL | QDNGYNG   | LLIAINPQVPE         | X(02)         | NLISNIK      | EMITTEASFY    | LFN       | ATKRR          |       |
| gi_74721541_Homo_sapiens_V24-L262                 | VTL | NNNGYDG   | IVIAINPSVPE         | X(02)         | KLIQNIK      | EMVTTEASTH    | LFH       | ATKQR          |       |
| gi_205831469_Homo_sapiens_I24-L262                | IKL | NNNGFED   | IVIVDPSVPE          | X(02)         | KIEQIE       | DMVTTASTY     | LFE       | ATEKR          |       |
| gi_157818579_Rattus_norvegicus                    | IQL | NNNGYEG   | IVIAIDHDVPE         | X(02)         | ALIQRIK      | DMVTSASTPY    | LFE       | ATGKR          |       |
| gi_126306129_Monodelphis_domestica                | IEL | NNNGYEN   | IVIAIDPALQE         | X(02)         | KLIQHIK      | DMVSEASNY     | LYG       | ATEKR          |       |
| gi_301609304_Xenopus_tropicalis                   | IKL | NGGGYED   | IVIAIHPNVTE         | X(02)         | KIENVQ       | NMVKEANQY     | LFN       | ATKQR          |       |
| gi_327270784_Anolis_carolinensis                  | VKF | NNGAFED   | IVIAINPGLSE         | X(02)         | KIINNIIK     | DMVKEASSY     | LFI       | ATEQR          |       |
| gi_301768028_Ailuropoda_melanoleuca               | VQL | QDNGYDG   | LLIAINPQVPE         | X(02)         | NLIYNIK      | EMITTEASFY    | LFN       | ATKRR          |       |
| gi_198415896_Ciona_intestinalis                   | VTL | VNNGYDG   | IVVAINPAVAEDX       | (01)          | TLINKIR      | NMFTTRASPT    | LFT       | ATKKR          |       |
| gi_326674112_Danio_rerio                          | IKL | DGGGYVD   | ITIAIGAKVKQ         | X(02)         | TLIDKIK      | EMVTDGGSFY    | LYH       | ALDKK          |       |
| gi_291221810_Saccoglossus_kowalevskii             | IVL | RDNGYEG   | IVIAIHNVKEDX        | (01)          | QLIQIK       | DTFTAASAF     | LYT       | ATNYS          |       |
| gi_260795693_Branchiostoma_floridae               | IKL | QNNYEYD   | VLIAIHQDVPEDX       | (01)          | RIVERLK      | EILTEASEE     | LYV       | STNSR          |       |
| gi_198417752_Ciona_intestinalis                   | VSL | VGNSYQG   | VVIAINPEIAESX       | (01)          | TLLNSIK      | AAWTTEASAA    | LYT       | ATRKR          |       |
| gi_291242482_Saccoglossus_kowalevskii             | VTI | SDNGYDG   | IVVAIHRHISENX       | (01)          | SLIDEIK      | NAFTDASAF     | LYR       | ATNNR          |       |
| gi_115964593_Strongylocentrotus_purpuratus        | INL | NDGAYSN   | LLIAIHKNVPEDX       | (01)          | TIENLTK      | TMFTSASQR     | LYN       | ATKQR          |       |
| gi_196006922_Trichoplax_adhaerens                 | ITL | RKNGYEG   | IVLAISEQVEEKX       | (03)          | DLIDVLN      | TLARASVY      | LFS       | ATKQR          |       |
| gi_321455024_Daphnia_pulex                        | VTL | TRDGYQN   | VVVSIEENSGFAX       | (03)          | KGLDTVK      | EMIRNTSKS     | FAQ       | ALERP          |       |
| gi_291398577_Oryctolagus_cuniculus                | VNL | NNNGYDG   | IVIAINPSVPE         | X(02)         | KLIQNIK      | EMVTDASTY     | LFQ       | ATKRR          |       |
| gi_149636528_Ornithorhynchus_anatinus             | IEL | KNGYEG    | IVIAINPQVPE         | X(02)         | KIQIK        | DMVTTEASTY    | LFK       | ATKKL          |       |
| gi_148680070_Mus_musculus                         | IKL | NENGYED   | IIAIDPAVPE          | X(02)         | TIERMK       | EMVTKASTY     | LFE       | ATEKR          |       |
| gi_118094354_Gallus_gallus                        | VKL | NESGYED   | LVVAINPSVTE         | X(02)         | NIILNTK      | AMIKDASNY     | LFE       | ATKHR          |       |
| gi_327270788_Anolis_carolinensis                  | VKL | HNGGYED   | VVIGIHPKIAE         | X(02)         | KIINSIKX(17) | DMLEASSY      | LFR       | ASQRR          |       |
| gi_260796397_Branchiostoma_floridae               | IQL | QNNYEYD   | VLIAINRNIPEDX       | (01)          | QIVDRLK      | EIFTEASEA     | LYI       | ATRSR          |       |
| gi_291223817_Saccoglossus_kowalevskii             | ISA | QANEYKG   | LVIAIHNSIQEDX       | (01)          | RLIERIK      | TVFTTGSEY     | LFN       | ALQRR          |       |
| gi_291223807_Saccoglossus_kowalevskii             | ITL | ESNGYTG   | LLIAIHQRVPEDX       | (01)          | TILQRLK      | DIFTDASKY     | MYQ       | ASRQY          |       |
| gi_291222847_Saccoglossus_kowalevskii             | IYL | VDNKYTP   | IHIAIHSDVEESX       | (01)          | AMIDDI       | DLITEASAY     | LYE       | ATRRR          |       |
| gi_198421549_Ciona_intestinalis                   | VNL | VNNGYEG   | IVVAINPSIPEDX       | (01)          | SLVDNIK      | TLLNEASPI     | LWS       | ATKNR          |       |
| gi_321460553_Daphnia_pulex                        | VTI | TDNGYKN   | LVVAISPAAPIDX       | (03)          | SIKNIK       | QITTEASPV     | LYK       | ATGNR          |       |
| gi_291231970_Saccoglossus_kowalevskii             | VYL | SNNEYHD   | IVIAIDENVPEDX       | (01)          | SIIDNIM      | TIFTDASEF     | LYE       | VTRHR          |       |
| gi_321460551_Daphnia_pulex                        | -   | TNSGYNN   | LVVAISSETPASX       | (03)          | IIDNIK       | KMISEASPV     | LYV       | ATENR          |       |
| gi_260786375_Branchiostoma_floridae               | VTI | TNNGYST   | VLVAISEKVP          | PEAX(03)      | DLIQNIL      | TAFTDASEY     | LYQ       | ATKNR          |       |
| gi_196007642_Trichoplax_adhaerens                 | VTI | KENGYAG   | VVVAISENIVESX       | (03)          | TLVSDLI      | QNFINASSY     | LYT       | ATRRR          |       |
| gi_196007110_Trichoplax_adhaerens                 | VQL | TNNGYEG   | VVIGISDSVSESX       | (03)          | DLLDQIQ      | STFNKSSSK     | IYT       | AFRRR          |       |
| gi_115963085_Strongylocentrotus_purpuratus        | -   | -         | -                   | -             | -            | DMFREGSTF     | LYQ       | ATRRR          |       |
| gi_321460554_Daphnia_pulex                        | VKL | DQNGYEN   | VLIRIADDVSSVX       | (03)          | QTISNLK      | VMLEASSA      | LCT       | AVEGR          |       |
| gi_115650848_Strongylocentrotus_purpuratus        | -   | -         | -                   | -             | -            | DIFRAGSSI     | LFN       | ATNLR          |       |
| gi_328707920_Acyrthosiphon_pisum                  | -   | QSGAYDN   | VVVAIKDSVPVTX       | (03)          | LIVNNVE      | AAFTSGSKS     | LHE       | ALSGK          |       |
| gi_270012532_Tribolium_castaneum                  | -   | -         | -                   | -             | -            | ETLTSASQY     | LFS       | ALDSR          |       |
| gi_301604098_Xenopus_tropicalis                   | VQL | NSGGYDN   | ILIAIDPDVSE         | X(02)         | RILENIQ      | DMVKEATHY     | LFN       | ATKKR          |       |
| gi_149636524_Ornithorhynchus_anatinus             | IHL | NSNRYEN   | LVIAINPDVPE         | X(02)         | KIIDKIK      | EMVSEASMY     | LFQ       | ATEKR          |       |
| gi_118094412_Gallus_gallus                        | VVL | RDGGYEG   | LLAAVHPRVPE         | X(02)         | RLVAHLQ      | EMITTEASSY    | LFS       | ATKGR          |       |
| gi_72168566_Strongylocentrotus_purpuratus         | ITI | QDGGYEN   | VLIAINKDVPEDX       | (01)          | TIIDNLI      | DIFSSGSGH     | LFT       | ATRRR          |       |
| gi_260807874_Branchiostoma_floridae               | IVL | ENNGYEN   | VLVAISPAVPEDX       | (01)          | RIVARLQ      | EILTEESQA     | MYD       | ATERR          |       |
| gi_291242943_Saccoglossus_kowalevskii             | AKL | VDNGYDN   | VLVAINGHVPEX        | (01)          | EIIDNLK      | EAFTEASDY     | LYR       | ATRQR          |       |
| gi_291223811_Saccoglossus_kowalevskii             | IRL | EDNGYKG   | ILIAINENVAENX       | (01)          | TLIENLK      | EMFTSASRE     | MYQ       | ATHNR          |       |
| gi_291239167_Saccoglossus_kowalevskii             | INL | IDNGYET   | ILIAIHESVPEDX       | (01)          | RIVDRLK      | EIFTDASGF     | VFQ       | GTFRN          |       |
| gi_260810520_Branchiostoma_floridae               | -   | KLQNNGYTD | VLIAINNVIPEDX       | (01)          | NIHRLK       | EVFTEASEE     | LYS       | ATKNR          |       |
| gi_291239807_Saccoglossus_kowalevskii             | VTI | VNNEYHD   | IVIAIEENVPEDX       | (01)          | ALLDKIQ      | EVFTDASAF     | LCE       | ITRYR          |       |
| gi_260793444_Branchiostoma_floridae               | -   | -         | -                   | -             | -            | IVTDASEYX(01) | LHL       | TTRQR          |       |
| gi_291242484_Saccoglossus_kowalevskii             | -   | TI        | SDNGYDG             | IVVAIHADISEHX | (01)         | DLIDKIK       | DAFTDASAF | LYT            | ATNNR |
| gi_291229678_Saccoglossus_kowalevskii             | VTI | QNNYEYRN  | IVIAINENVPEDX       | (01)          | HLLDRIR      | EIFTKASAF     | LYK       | ATRYR          |       |
| gi_291223815_Saccoglossus_kowalevskii             | -   | -         | -                   | -             | LR           | DVFTTEASAF    | LYR       | ATKHR          |       |
| gi_196007112_Trichoplax_adhaerens                 | ARL | INNGYED   | VVIAISNSVSE         | ERX(03)       | NLLDQIQ      | RIFTESSSR     | LYT       | AFRRR          |       |
| gi_72152222_Strongylocentrotus_purpuratus         | -   | -         | -                   | -             | -            | IFTSGSSF(01)  | LFN       | ATNGR          |       |
| gi_195998007_Trichoplax_adhaerens                 | VTI | NNNGYED   | ITVALSPSITQTX       | (03)          | NIIDKIR      | QLLTVASGY     | LYT       | ATRRR          |       |
| gi_198419444_Ciona_intestinalis                   | -   | -         | -                   | -             | -            | -             | -         | -              |       |
| gi_198415894_Ciona_intestinalis                   | -   | -         | -                   | -             | -            | -             | -         | -              |       |
| gi_260786377_Branchiostoma_floridae               | ARL | QNNAYQD   | VVVAIAESVPEDX       | (01)          | ALLTSLR      | VKFTTEASYQ    | LFA       | ATGGR          |       |
| gi_338161004_Xenopus_laevis                       | IKL | QNGGYED   | IVIAINPGLRE         | X(02)         | KIENIQ       | NMIKDTPY      | LFS       | ATRRR          |       |
| gi_301609308_Xenopus_tropicalis                   | VQL | KNGGYED   | IIIAVNPQVPE         | X(02)         | KIENIK       | KMLTDASSY     | LFQ       | ATKKR          |       |
| gi_291222148_Saccoglossus_kowalevskii             | VSL | EDNGYRD   | VLVAIHESI           | EEDX(01)      | LLITRIK      | EIFTSASSH     | LHL       | ATEYH          |       |
| gi_291223809_Saccoglossus_kowalevskii             | VKL | EENGYTG   | IVIAIHSSIPENX       | (01)          | QIEQLQ       | VAFTDASDF     | LFT       | ATKRR          |       |
| gi_321460550_Daphnia_pulex                        | ISI | ANNAYSN   | IVVAISPDVPNTX       | (03)          | IILKNIQ      | LMIRRASV      | LYR       | ATEKR          |       |
| gi_321478616_Daphnia_pulex                        | VNI | VTNGYRD   | IVVAISPDVSPNX       | (03)          | DLLNKLK      | LLITEASFD     | LYE       | ATRRR          |       |
| gi_241581081_Ixodes_scapularis                    | IDT | TDGGYRD   | VVVAIHPSVTPDX       | (01)          | NIIVNIK      | ALFREASLF     | LHR       | ATRRR          |       |
| gi_291224467_Saccoglossus_kowalevskii             | VTI | INNEYHD   | IVIAIEDNVPEDX       | (01)          | ALLDKIQ      | EVFTDASAF     | LSX(67)   | RSRYR          |       |
| gi_321467441_Daphnia_pulex                        | IVL | EGNGYSN   | IVVAISKDIPQX        | (05)          | ELIDKIK      | DLLTEASAV     | LFK       | ATDDK          |       |
| gi_198424353_Ciona_intestinalis                   | -   | L         | INNGYGN             | LTIWIGPEVPEX  | (01)         | ELVTKLQ       | ELITKTS   | LFR            | LTGKR |
| gi_198419582_Ciona_intestinalis                   | -   | -         | -                   | -             | -            | -             | -         | -              |       |
| gi_312373778_Anopheles_darlingi                   | -   | -         | -                   | -             | -            | MLTASASQY     | LFN       | ALDSR          |       |
| gi_242023388_Pediculus_humanus_corporis           | -   | -         | -                   | -             | -            | TSASKS        | LFS       | SLDGR          |       |
| gi_115749084_Strongylocentrotus_purpuratus        | -   | -         | -                   | -             | -            | -             | -         | -              |       |
| gi_241672368_Ixodes_scapularis                    | ITF | PASGF     | -                   | -             | QPP          | -             | -         | -              |       |
| gi_313226492_Oikopleura_dioica                    | VKL | VKNGYEG   | LYIAISNKVPEDX       | (01)          | SLVGKLV      | WLLHAFSRS     | LFA       | KTQKN          |       |
| gi_241998382_Ixodes_scapularis                    | VTI | GKDGSYEN  | VIVAIGKDVYQX        | (01)          | DIIVMLK      | ALFRKASAF     | LLK       | ATRGK          |       |
| gi_321462270_Daphnia_pulex                        | -   | -         | -                   | YKVEE         | -            | KEMMMG        | -         | NVLTATSEQ      |       |
| gi_320352592_Desulfohalobium_propionicum_DSM_2032 | AAC | RDRNIVNL  | SVAVHYDAP           | X(01)         | GDITTIQ      | NMVSAGSTT     | LFQ       | VTGQ           |       |
| gi_159898230_Herpetosiphon_aurantiacus_DSM_785    | -   | SSDFQNLHL | LIVSIEWQPGQX        | (17)          | SLQEILT      | TALQETSQT     | LYQ       | ATDQ           |       |
| gi_260426558_Citreicella_sp._SE45                 | DGS | VDPSNGDL  | DFSVHFNFP           | X(03)         | AQIDDTK      | AAIEQLALG     | ICD       | ATDQ           |       |
| gi_149919617_Plesiocystis_pacifica_SIR1           | -   | TQ        | GAGATTSVHATIDVHVAFP | X(03)         | DELDEL       | EVLQESARM     | ICD       | VTGG           |       |
| gi_114046070_Sewanella_sp._MR7                    | -   | -         | ENKLSK              | VAICVGFALTSX  | (26)         | NHMQAVS       | -         | AMSSDSSNAX(30) |       |
| gi_148657095_Roseiflexus_sp._RS1                  | -   | -         | -                   | LTIGLYRNPNSQX | (01)         | RAVYE         | -         | EMIRYLADA      |       |
| gi_312879450_Aminomonas_paucivorans_DSM_12260     | -   | -         | -                   | -             | -            | -             | -         | VIKYWADA       |       |
| gi_114321541_Alkalilimnicola_ehrlichii_MLHE1      | -   | DSWFSK    | ARIGADTAPASAX       | (08)          | DRVV         | GASTDAGTTX    | (31)      | VCE            |       |
| gi_57642113_Thermococcus_kodakarensis_KOD1        | -   | DILGIS    | LTVSTEWALS          | X(03)         | KRNLV        | YSIRKASDF     | VYD       | YTDGY          |       |
| gi_254173443_Thermococcus_sp._AM4                 | -   | -         | LTVSEWKMS           | X(03)         | KEKLV        | YSIRKASDF     | IYD       | YTDGY          |       |
| gi_254172615_Thermococcus_sp._AM4                 | -   | DILGIQ    | LNVSEWKMS           | X(03)         | KEKLV        | YSIRKASDF     | IYD       | YTDGY          |       |
| gi_163848422_Chloroflexus_aurantiacus_J10f1       | -   | -         | IDVSEWDAR           | X(03)         | GYMAQLR      | TDLRRASEL     | LYD       | WTNGQ          |       |
| gi_240103523_Thermococcus_gammatolerans_EJ3       | -   | -         | LTVSEWDMS           | X(03)         | KRNLV        | YSIRKASDF     | VYD       | HTDGY          |       |
| gi_309791403_Oscillochloris_trichoides_DG6        | -   | -         | LPVYSEWDVR          | X(03)         | AFLRLQ       | SDLERASEL     | LYD       | WTGQ           |       |
| gi_309791671_Oscillochloris_trichoides_DG6        | -   | -         | ALIN                | LVVSEWDAR     | X(03)        | RFMTQLR       | LYD       | ATNGQ          |       |
| gi_309790879_Oscillochloris_trichoides_DG6        | -   | -         | -                   | -             | FMHALR       | SRLQRTSEV     | LYD       | WSNGQ          |       |
| gi_159898060_Herpetosiphon_aurantiacus_DSM_785    | TIA | TKVCLFN   | VLVAIEWVP           | X(02)         | IELNQLQ      | WAFRRASDF     | LFD       | VSNGT          |       |

|                                                 | 70         | 80      | 90          | 100     | 110          | 120     | 130            |               |          |               |         |     |
|-------------------------------------------------|------------|---------|-------------|---------|--------------|---------|----------------|---------------|----------|---------------|---------|-----|
| gi_110611231_Homo_sapiens_I25-K262              | FYFKNVAAIL | -----   | IPET-WKTKA  | D-----  | YV-RPX (03)  | TYKNADV | LVVAEST        | -----         | PPX (01) | N--           |         |     |
| gi_5729769_Homo_sapiens_V33-A262                | VFFRNLIKIL | -----   | IPAT-WKANN  | -----   | NS-KIX (03)  | SYEKANV | IVTDWY         | -----         | GAX (01) | G--           |         |     |
| gi_74721541_Homo_sapiens_V24-L262               | AYFRNVSIL  | -----   | IPMT-YKSKS  | E-----  | YL-IPX (03)  | TYDQADV | IVADLY         | -----         | LKX (01) | G--           |         |     |
| gi_205831469_Homo_sapiens_I24-L262              | FFFKNVSI   | -----   | IPEN-WKENP  | Q-----  | YK-RPX (03)  | NHKNADV | IVAPPT         | -----         | LPX (01) | R--           |         |     |
| gi_157818579_Rattus_norvegicus                  | FYFKNVAAIL | -----   | IPEN-WNTKP  | E-----  | YK-RPX (03)  | TLKNADV | LVSTMS         | -----         | PIX (01) | N--           |         |     |
| gi_126306129_Monodelphis_domestica              | FYFKGVSIL  | -----   | IPET-WQKKP  | E-----  | YE-KPX (03)  | TYKKADV | IVDPN          | -----         | PPX (01) | N--           |         |     |
| gi_301609304_Xenopus_tropicalis                 | LFIKSAKIL  | -----   | IPFK-WSKHN  | N-----  | AD-KPX (03)  | TYDKADV | IVAEPH         | -----         | LKX (01) | G--           |         |     |
| gi_327270784_Anolis_carolinensis                | FYFKTVKVV  | -----   | IPLT-WAAKP  | E-----  | YA-RVX (03)  | SYTNADI | IVADPF         | -----         | LKX (01) | G--           |         |     |
| gi_301768028_Ailuropoda_melanoleuca             | VFFRNTKIL  | -----   | IPAT-WRANN  | -----   | YS-KVX (03)  | LYEKANV | IVTDWY         | -----         | GAX (01) | G--           |         |     |
| gi_198415896_Ciona_intestinalis                 | AYFRNINIL  | -----   | VPKT-WTSGS  | -----   | YQ-TAX (03)  | TYRKADV | IVAPPN         | -----         | PVX (01) | G--           |         |     |
| gi_326674112_Danio_rerio                        | VYLKDATIL  | -----   | VPSH-WSCKS  | -----   | CS-KAX (03)  | SFEKAKI | KIDHAK         | -----         | L-----   | ---           |         |     |
| gi_291221810_SaccoGLOSSUS_kowalevskii           | TYFRNITLL  | -----   | IPLS-WSNKP  | E-----  | YE-MAX (03)  | TFEKAPI | VVQK-X (02)    | -----         | PLX (01) | G--           |         |     |
| gi_260795693_Branchiostoma_floridae             | AFFKEVKIL  | -----   | IPKT-WSKKG  | E-----  | YL-PAX (03)  | TFERANV | RVVDPN         | -----         | ALX (01) | G--           |         |     |
| gi_198417752_Ciona_intestinalis                 | AYFGNITIL  | -----   | VPKS-WNG--  | T-----  | YK-RAX (03)  | TYDAADV | RVVNT          | X (01)        | RVX (01) | G--           |         |     |
| gi_291242482_Saccoglossus_kowalevskii           | VYFQNTIL   | -----   | VPTG-WSENS  | G-----  | YG-MAX (03)  | TYETADV | RVVTK-X (02)   | -----         | GX (01)  | D--           |         |     |
| gi_115964593_Strongylocentrotus_purpuratus      | VHWSHIKIL  | -----   | VPNT-WSIQS  | Q-----  | YQ-LAX (03)  | TLQSANM | LVHS-X (01)    | -----         | X (01)   | D--           |         |     |
| gi_196006922_Trichoplax_adhaerens               | AYFKGITIL  | -----   | IPET-WEDNS  | I-----  | YE-PAX (03)  | TYNTADI | RVVDDY         | X (02)        | ARX (01) | A--           |         |     |
| gi_321455024_Daphnia_pulex                      | AYFGNVTII  | -----   | FPDS-WVADP  | L-----  | CSP-LMX (11) | RSHRADV | RVVTPDH        | -----         | PVX (01) | G--           |         |     |
| gi_291398577_Oryctolagus_cuniculus              | VFFRNVHIL  | -----   | VPIT-WKSKS  | E-----  | YL-MPX (03)  | SYDQADV | IVIANPS        | -----         | LKX (01) | A--           |         |     |
| gi_149636528_Ornithorhynchus_anatinus           | FYLKSVTIL  | -----   | IPET-WRDKP  | D-----  | YS-IAAX (03) | SYKTADI | IVAEAS         | -----         | PVX (01) | G--           |         |     |
| gi_148680070_Mus_musculus                       | FFFKNVSI   | -----   | IPES-WKDSP  | H-----  | YR-RPX (03)  | SYKHADV | IVAPPA         | -----         | FMX (01) | R--           |         |     |
| gi_118094354_Gallus_gallus                      | FFFKSVKII  | -----   | LPKT-WKNS   | T-----  | YS-RLX (03)  | SYNKADV | IVADPY         | -----         | LKX (01) | G--           |         |     |
| gi_327270788_Anolis_carolinensis                | FYFRTVKIV  | -----   | IPLT-WASKP  | E-----  | YK-RAX (03)  | SYVNADI | IVAEFP         | -----         | VKX (01) | G--           |         |     |
| gi_260796397_Branchiostoma_floridae             | AYIKQVKIL  | -----   | IPNT-WTRQP  | Q-----  | YL-PPX (03)  | TFDRANV | RVVDVQN        | -----         | PLX (01) | G--           |         |     |
| gi_291223817_SaccoGLOSSUS_kowalevskii           | IFWKQITIL  | -----   | IPKT-WSVKP  | E-----  | YM-AAX (03)  | SFERAHV | IVIDN-X (02)   | -----         | PDX (01) | G--           |         |     |
| gi_291223807_Saccoglossus_kowalevskii           | THFHDTVIL  | -----   | VPST-WSDNS  | A-----  | YL-TAX (03)  | TYDLGNI | LVDE-X (02)    | -----         | PEX (01) | W--           |         |     |
| gi_291222847_Saccoglossus_kowalevskii           | AHFKDIVIL  | -----   | IPHT-WKYNP  | H-----  | V-RAX (03)   | SYDTANI | IVIDD-X (02)   | -----         | PIX (01) | G--           |         |     |
| gi_198421549_Ciona_intestinalis                 | AYFGEVITIL | -----   | VPST-WTGSY  | -----   | TQ-ATX (03)  | VYNKADI | IVADPN         | -----         | PQX (01) | M--           |         |     |
| gi_321460553_Daphnia_pulex                      | AYFQSVHIL  | -----   | IPET-WDHIE  | -----   | AD-LSX (03)  | TFDTADV | IVDTPN         | -----         | PMX (01) | K--           |         |     |
| gi_291231970_Saccoglossus_kowalevskii           | AFFKDISIL  | -----   | VPKS-WDDNL  | E-----  | YG-SAX (03)  | TYDKADV | RVVIRE         | -----         | NDX (01) | N--           |         |     |
| gi_321460551_Daphnia_pulex                      | AYFQSVHIL  | -----   | IPAE-WEHDE  | -----   | AS-PSX (03)  | TFNTADV | IVDTPN         | -----         | AMX (01) | K--           |         |     |
| gi_260786375_Branchiostoma_floridae             | AYFKDVTVL  | -----   | IPHT-WKDMS  | S-----  | YE-DAX (03)  | TFEKANV | RVVDLP-X (01)  | -----         | SHX (01) | G--           |         |     |
| gi_196007642_Trichoplax_adhaerens               | AFFKNVTIL  | -----   | IPAT-WQDKV  | T-----  | YQ-AAX (03)  | SFDSADV | FRIDLX (02)    | -----         | X (01)   | ---           |         |     |
| gi_196007110_Trichoplax_adhaerens               | AFFRHITII  | -----   | IPRS-WKNSI  | K-----  | YK-PAX (03)  | SFHTADV | FRIEHTK        | -----         | ASX (05) | S--           |         |     |
| gi_115963085_Strongylocentrotus_purpuratus      | VFFKNVTIL  | -----   | IPSH-WTTQP  | E-----  | YG-SPX (03)  | TFDTADV | IVAQPP-X (01)  | -----         | PLX (01) | A--           |         |     |
| gi_321460554_Daphnia_pulex                      | AYFRNVTIL  | -----   | IPNH-WAARN  | N-----  | CL-VEX (06)  | RTHMADV | LVTSNH         | -----         | PNX (01) | G--           |         |     |
| gi_115650848_Strongylocentrotus_purpuratus      | VYLRGITIL  | -----   | VPPT-WSRNS  | E-----  | YQ-VAX (03)  | AYENANV | LVVTD-X (02)   | -----         | X (01)   | N--           |         |     |
| gi_328707920_Acyrthosiphon_pisum                | AYFRSVTVM  | -----   | LPQN-WPDHCV | G-----  | HLRGI (03)   | OGETPDV | TVLPRG         | -----         | PVX (01) | G--           |         |     |
| gi_270012532_Tribolium_castaneum                | AFLRSATVL  | -----   | LPPT-WPDSC  | A-----  | SS-AVX (03)  | SGETPDV | TVLPRG         | -----         | PX (01)  | R--           |         |     |
| gi_301604098_Xenopus_tropicalis                 | IFIRSVKIL  | -----   | IPVT-WTSKD  | I-----  | YQ-LRX (03)  | TYEKAEV | IVIANPY        | -----         | LKX (01) | G--           |         |     |
| gi_149636524_Ornithorhynchus_anatinus           | FYFGNVSIL  | -----   | IPPT-WQSEA  | S-----  | YL-IPX (03)  | SYDKADV | IVADPF         | -----         | VKX (01) | G--           |         |     |
| gi_118094412_Gallus_gallus                      | FYFRSVKIL  | -----   | IPPT-WKEKS  | -----   | YE-KPX (03)  | TYEKADV | IVAAPY         | -----         | WKX (01) | G--           |         |     |
| gi_72168566_Strongylocentrotus_purpuratus       | AYWRNITIL  | -----   | IPKT-WTPKP  | E-----  | YE-PAX (03)  | SFETANV | IVDT-X (02)    | -----         | PEX (01) | E--           |         |     |
| gi_260807874_Branchiostoma_floridae             | AYLKNITIL  | -----   | IPKS-WTPQP  | E-----  | YR-TAX (03)  | LFQRANV | RVVDQLN        | -----         | PLX (01) | G--           |         |     |
| gi_291242943_Saccoglossus_kowalevskii           | AFFRKVDL   | -----   | IPTT-WQDRP  | E-----  | YE-AVX (03)  | RFSRADV | RVVEAN         | -----         | PVX (01) | G--           |         |     |
| gi_291223811_Saccoglossus_kowalevskii           | AYMKEITIL  | -----   | VPKT-WSDAI  | T-----  | NI-SAX (03)  | IFDSANI | IVDKAN         | -----         | AEX (01) | D--           |         |     |
| gi_291239167_Saccoglossus_kowalevskii           | TYFRNVTIL  | -----   | LPNT-WSDEL  | R-----  | EA-PAX (03)  | RFDIANV | IVDQ-X (02)    | -----         | PNX (01) | G--           |         |     |
| gi_260810520_Branchiostoma_floridae             | AFFKEIKIL  | -----   | IPKT-WSKKE  | E-----  | YL-LAX (03)  | TFERANV | RVVLSN         | -----         | PRX (01) | P--           |         |     |
| gi_291239807_Saccoglossus_kowalevskii           | AYFKNITIL  | -----   | VPKF-WSDNV  | Q-----  | YE-MPX (03)  | SYTSDV  | IRIDNS-X (01)  | -----         | Y-----   | ---           |         |     |
| gi_260793444_Branchiostoma_floridae             | AYFGGVSIL  | -----   | VPET-WQDRP  | E-----  | YE-SAX (03)  | TYDTSV  | RVVAEPN        | -----         | PEX (01) | D--           |         |     |
| gi_291242484_Saccoglossus_kowalevskii           | VYFRNITIL  | -----   | VPTE-WSEDL  | G-----  | YV-MSX (03)  | TYETANV | RVVDK-X (02)   | -----         | GX (01)  | D--           |         |     |
| gi_291229678_Saccoglossus_kowalevskii           | AFFKDIVIL  | -----   | VPNS-WSDNP  | D-----  | YE-TPX (03)  | SYDKADV | IVDYPDX (02)   | -----         | SRX (01) | G--           |         |     |
| gi_291223815_Saccoglossus_kowalevskii           | VYFRNITIL  | -----   | VPAR-WSEDL  | G-----  | YR-MAX (03)  | TYETAHV | RVVDK-X (02)   | -----         | TX (01)  | G--           |         |     |
| gi_196007112_Trichoplax_adhaerens               | AYFRYITIV  | -----   | IPRS-WEDNA  | K-----  | YE-PAX (03)  | SFHTADV | FRIDHDT        | -----         | VSX (05) | S--           |         |     |
| gi_72152222_Strongylocentrotus_purpuratus       | AFFRDVAAIL | -----   | IPKN-WPQLP  | T-----  | HK-FAX (04)  | QLGTANL | LVVPTGX (02)   | -----         | PDX (01) | P--           |         |     |
| gi_195998007_Trichoplax_adhaerens               | AYFRQITIV  | -----   | LPSS-WSTTS  | D-----  | QS-VTX (03)  | NYWNADI | QVDSFD         | -----         | RRX (01) | LDI           |         |     |
| gi_198419444_Ciona_intestinalis                 | -----      | -----   | -----       | -----   | -----        | -----   | KADV           | IVIAEAN       | -----    | PVX (01)      | Q--     |     |
| gi_198415894_Ciona_intestinalis                 | -----      | -----   | -----       | -----   | -----        | -----   | ADV            | IVIAQAN       | -----    | PQX (01)      | G--     |     |
| gi_260786377_Branchiostoma_floridae             | AYFGTVKIL  | -----   | VPRT-WDYYG  | S-----  | YQ-FSX (03)  | RFGRADV | RVVPAV         | -----         | D-X (04) | F--           |         |     |
| gi_338161004_Xenopus_laevis                     | VYIRSVKIL  | -----   | IPIT-WPNK   | N-----  | YT-KAX (03)  | TYDKADV | IVIASPH        | -----         | VKX (01) | G--           |         |     |
| gi_301609308_Xenopus_tropicalis                 | LYIRSAKIL  | -----   | IPNT-WATNS  | S-----  | YG-RPX (03)  | SYDKADV | IVAPPF         | -----         | VX (01)  | G--           |         |     |
| gi_291222148_Saccoglossus_kowalevskii           | TYFNNTIL   | -----   | IPKT-WSDNL  | T-----  | EA-AAX (03)  | RFDLANV | IVDQ-X (02)    | -----         | TNX (01) | G--           |         |     |
| gi_291223809_Saccoglossus_kowalevskii           | AYFKDISIL  | -----   | IPPT-WSHKS  | E-----  | YS-NAX (03)  | SYEKANV | IVDT-X (02)    | -----         | AVX (01) | G--           |         |     |
| gi_321460550_Daphnia_pulex                      | AYFKDVRIL  | -----   | VPES-WSNIR  | -----   | AN-LSX (03)  | TYSEADV | RVVAPP         | -----         | STX (01) | G--           |         |     |
| gi_321478616_Daphnia_pulex                      | SYIESVNIL  | -----   | IPQT-WVNV   | T-----  | AN-ASX (03)  | NFPDAE  | IVQIDNPS       | -----         | WRX (01) | G--           |         |     |
| gi_241581081_Ixodes_scapularis                  | VFFKDVITIA | -----   | VPST-WPRRE  | E-----  | AEA-TX (03)  | LFDGADV | RVVAEPN        | -----         | P-X (02) | G--           |         |     |
| gi_291224467_Saccoglossus_kowalevskii           | AYFKSITIL  | -----   | VPKS-WTDDP  | Q-----  | YE-THX (03)  | TYETSDV | IRIDDT-X (01)  | -----         | H-----   | ---           |         |     |
| gi_321467441_Daphnia_pulex                      | VYFKSIDIV  | -----   | IPPS-WKDTE  | A-----  | SN-TLX (12)  | SFQLADV | RVVRLNS-X (02) | -----         | AX (01)  | N--           |         |     |
| gi_198424353_Ciona_intestinalis                 | AYIRNVI IA | -----   | IPKT-WGTPP  | E-----  | SFNQXS (07)  | SQTSADV | RVVRSNS        | -----         | PRX (17) | V--           |         |     |
| gi_198419582_Ciona_intestinalis                 | -----      | -----   | -----       | -----   | -----        | -----   | ADV            | IVAPAN        | -----    | SAX (01)      | G--     |     |
| gi_312373778_Anopheles_darlingi                 | VYFGEVSVI  | -----   | LPNH-WPQTCI | P-----  | YNQTRX (03)  | SGETSDV | TVIRPHT        | -----         | KX (01)  | E--           |         |     |
| gi_242023388_Pediculus_humanus_corporis         | AYFREISIN  | -----   | LPDH-WSDSC  | V-----  | NG-PIX (03)  | KGEEFDF | VVGRSH         | -----         | PVX (01) | G--           |         |     |
| gi_115749084_Strongylocentrotus_purpuratus      | -----      | -----   | -----       | -----   | -----        | -----   | -----          | -----         | -----    | ---           |         |     |
| gi_241672368_Ixodes_scapularis                  | AYLEEVIVL  | -----   | VPKS-WGPKE  | T-----  | WA-RAX (11)  | LHRDADV | RVVLEPQG       | -----         | SPX (01) | G--           |         |     |
| gi_313226492_Oikopleura_dioica                  | LYLRKSVIV  | -----   | VPET-WNPLQ  | EX (03) | YE-RNX (27)  | NFENTPM | RVVYHS-X (01)  | -----         | DYX (02) | N--           |         |     |
| gi_241998382_Ixodes_scapularis                  | FYFKDVIS   | -----   | MPKN-WPKKN  | S-----  | RKE-VX (03)  | QFDQANV | QVVSGL         | -----         | T-----   | ---           |         |     |
| gi_321462270_Daphnia_pulex                      | LQWDKVTIL  | -----   | VSKS-LAQDC  | FX (15) | RM-NAX (03)  | AAQTADV | LVHSK-X (02)   | -----         | PLX (01) | A--           |         |     |
| gi_320352592_Desulfobulbus_propionicus_DSM_2032 | TEIGQATIH  | -----   | NNSAGTT     | -----   | -----        | -----   | RADIRV         | YPATX (14)    | NDX (01) | A--           |         |     |
| gi_159898230_Herpetosiphon_aurantiacus_DSM_785  | VWVEQYSVY  | -----   | TSGEHWN     | -----   | -----        | -----   | DADIRI         | LANNX (03)    | -----    | ---           |         |     |
| gi_260426558_Citreicella_sp._SE45               | MRVRQVRLT  | -----   | QAQEDLD     | -----   | -----        | -----   | RAALWI         | HAINX (01)    | -----    | RX (01)       | G--     |     |
| gi_149919617_Plesiocystis_pacifica_SIR1         | VLITDYNLA  | -----   | SNGYSSA     | -----   | -----        | -----   | HADMYV         | YPDX (02)     | -----    | ---           |         |     |
| gi_114046070_Shewanella_sp._MR7                 | HKLKGISIF  | -----   | RENKHS      | -----   | -----        | -----   | KSDI           | IWGD          | -----    | ---           |         |     |
| gi_148657095_Roseiflexus_sp._RS1                | HKLRTVRIY  | -----   | PNNTSA      | -----   | -----        | -----   | KDI            | IWVE          | -----    | ---           |         |     |
| gi_312879450_Aminomonas_paucivorans_DSM_12260   | HTLGTVRIY  | -----   | QGGKFGD     | -----   | -----        | -----   | KASV           | LWKA          | -----    | ---           |         |     |
| gi_114321541_Alkalilimnicola_ehrlichii_MLHE1    | SQLGTVRVF  | -----   | TNGGHGS     | -----   | -----        | -----   | RADV           | IWNE          | -----    | ---           |         |     |
| gi_57642113_Thermococcus_kodakarensis_KOD1      | AMITSVQIW  | -----   | DDKRQWD     | -----   | -----        | -----   | DADV           | RVVHKT        | KX (04)  | -----         | QX (01) | R-- |
| gi_254173443_Thermococcus_sp._AM4               | AMIAARVTIW | -----   | DDKKNWD     | -----   | -----        | -----   | KADI           | QIHNGSX (04)  | -----    | VX (01)       | N--     |     |
| gi_254172615_Thermococcus_sp._AM4               | AMITRITVW  | -----   | DDKRNWD     | -----   | -----        | -----   | KADV           | RVVHDTTX (04) | -----    | QX (01)       | G--     |     |
| gi_163848422_Chloroflexus_aurantiacus_J10f1     | VALGRVRI   | -----   | HNRRERN     | -----   | -----        | -----   | LADV           | RVVYATNX (03) | -----    | ---           |         |     |
| gi_240103523_Thermococcus_gammatolerans_EJ3     | AMITRVTIW  | -----   | DDKKNWD     | -----   | -----        | -----   | KADV           | RVVYNTGX (04) | -----    | IX (01)       | N--     |     |
| gi_309791403_Oscillochloris_trichoides_DG6      | AALGALRIV  | -----   | ADGS-NPP    | -----   | -----        | -----   | LAGI           | HVYATNX (03)  | -----    | ---           |         |     |
| gi_309791671_Oscillochloris_trichoides_DG6      | VALGELHIF  | -----   | FAKSNWD     | -----   | -----        | -----   | NAHI           | RVVYASNX (03) | -----    | ---           |         |     |
| gi_309790879_Oscillochloris_trichoides_DG6      | VALGSITIV  | -----   | QNKERW      | SHVR D  | -----        | -----   | AQG-NX (03)    | -----         | RGVD     | LRIYAANX (03) | -----   |     |
| gi_159898060_Herpetosiphon_aurantiacus_DSM_785  | MAFGQVVF   | GX (18) | HPRS-WREG   | L-----  | -----        | -----   | -----          | -----         | -----    | -----         | -----   |     |



|                                                   | 210                                                                    | 220           | 230                                | 240       | 250                                   | 260       | 270                                 |
|---------------------------------------------------|------------------------------------------------------------------------|---------------|------------------------------------|-----------|---------------------------------------|-----------|-------------------------------------|
| gi_110611231_Homo_sapiens_I25-K262                | VFDEYNNDX (01) K                                                       | - - - - -     | FY LX (02) GR I Q A V R C S A - G  | - - - - - | IT GX (14) KR CT - F                  | - - - - - | NKV - T - G                         |
| gi_5729769_Homo_sapiens_V33-A262                  | VFDEYNNDX (01) P                                                       | - - - - -     | FY IX (03) NQ I K V T R C S S - D  | - - - - - | IT GX (11) EN CI -                    | - - - - - | I - S - K                           |
| gi_74721541_Homo_sapiens_V24-L262                 | VFDEYNVDX (01) P                                                       | - - - - -     | FY IX (03) NT T E A T R C S T - R  | - - - - - | IT VX (14) RP FR - R                  | - - - - - | DSQ - T - G                         |
| gi_205831469_Homo_sapiens_I24-L262                | VFDEYNEDX (01) P                                                       | - - - - -     | FY RX (03) KK I E A T R C S A - G  | - - - - - | IS GX (14) RA CR - I                  | - - - - - | DST - T - K                         |
| gi_157818579_Rattus_norvegicus                    | VFDEYNNX (01) K                                                        | - - - - -     | FY LX (02) GK P Q A V R C S A - T  | - - - - - | IT GX (15) GK CV - I                  | - - - - - | DRV - T - G                         |
| gi_126306129_Monodelphis_domestica                | VFDEYNEDX (01) P                                                       | - - - - -     | FY QX (02) GKN I P V K C S G - A   | - - - - - | IT GX (14) RN CR - T                  | - - - - - | DPQ - T - G                         |
| gi_301609304_Xenopus_tropicalis                   | VFDEYNYDX (01) P                                                       | - - - - -     | FY IX (03) GD V E A T R C S A - D  | - - - - - | IK GX (12) - NCS - P                  | - - - - - | DPK - T - G                         |
| gi_327270784_Anolis_carolinensis                  | VFDEYNNDX (01) P                                                       | - - - - -     | FY TX (03) NKA E A T R C S A - D   | - - - - - | IT GX (11) RK CK - I                  | - - - - - | DHR - T - Q                         |
| gi_301768028_Ailuropoda_melanoleuca               | VFDEYNDEX (01) P                                                       | - - - - -     | FY IX (03) NQ I K V T R C S S - D  | - - - - - | IT GX (11) EN CI -                    | - - - - - | I - S - K                           |
| gi_198415896_Ciona_intestinalis                   | VFDEYATGX (03) R                                                       | - - - - -     | HY LX (04) - VL QGT R C PL - S     | - - - - - | IR GX (13) QT CI - I                  | - - - - - | NQT - T - L                         |
| gi_326674112_Danio_rerio                          | VYDEYNEEX (01) P                                                       | - - - - -     | FY LX (02) GR V E Y T R C T - N    | - - - - - | IE GX (10) QS CR - I                  | - - - - - | NPE - T - F                         |
| gi_291221810_Saccoglossus_kowalevskii             | LFDEYVTDX (04) W                                                       | - - - - -     | FY - X (03) GE I HP V A C S T - E  | - - - - - | IQ GX (05) AAC ERR -                  | - - - - - | DDV - T - G                         |
| gi_260795693_Branchiostoma_floridae               | LFDEYGLDX (09) H                                                       | - - - - -     | FY RX (04) - G V R P T G C S T - W | - - - - - | VAG X (08) AP CR - L                  | - - - - - | DPG - T - G                         |
| gi_198417752_Ciona_intestinalis                   | VFDEIASGX (03) P                                                       | - - - - -     | FY I - - - -                       | - - - - - | GT I E A T R C S L - G                | - - - - - | IQGX (12) DVCN - Y                  |
| gi_291242482_Saccoglossus_kowalevskii             | LFDEYTVDX (04) H                                                       | - - - - -     | FY FX (03) GELHPVACHQ - W          | - - - - - | IR GX (02) - PCS - E                  | - - - - - | RG A - D - G                        |
| gi_115964593_Strongylocentrotus_purpuratus        | LFKEHYDYGX (05) P                                                      | - - - - -     | AYDX (03) GG I EG T R C S L - K    | - - - - - | IK GX (07) ND CP - N                  | - - - - - | SPN - E - G                         |
| gi_196006922_Trichoplax_adhaerens                 | LFDEYPYSX (03) F                                                       | - - - - -     | SY LX (03) GE V Q V T R C NS - Q   | - - - - - | LP GX (08) AP CT - Y                  | - - - - - | - - - - -                           |
| gi_321455024_Daphnia_pulex                        | VFDEEGMPX (07) G                                                       | - - - - -     | YLT YQTX (04) KIMRPNTCS - L        | - - - - - | KT PX (06) EN CQ - S                  | - - - - - | - - - - -                           |
| gi_291398577_Oryctolagus_cuniculus                | VFDEYNVDX (01) P                                                       | - - - - -     | FY SX (03) NT I E A T R C S T - Q  | - - - - - | IT GX (15) RP CR - W                  | - - - - - | DSQ - T - G                         |
| gi_149636528_Ornithorhynchus_anatinus             | VFDEYDDKX (01) P                                                       | - - - - -     | FY IX (03) GL PE A T R C S S - E   | - - - - - | IQ GX (14) KP CK - I                  | - - - - - | DRH - T - G                         |
| gi_148680070_Mus_musculus                         | VFDEYNEDX (01) P                                                       | - - - - -     | FY SX (03) KK I E A T R C S T - G  | - - - - - | IT GX (14) RS CR - T                  | - - - - - | NST - T - K                         |
| gi_118094354_Gallus_gallus                        | VFDEYNNDX (01) P                                                       | - - - - -     | FY VX (03) AR VE P T R C S A - G   | - - - - - | VT GX (14) REC Q - Y                  | - - - - - | D - - - - G - Q                     |
| gi_327270788_Anolis_carolinensis                  | VFEEYSYDX (01) P                                                       | - - - - -     | FY SX (03) NK I E A T R C S A - S  | - - - - - | IT GX (11) RR CR - I                  | - - - - - | ERH - T - E                         |
| gi_260796397_Branchiostoma_floridae               | LFDEYGFDX (08) H                                                       | - - - - -     | FY VX (04) - G I Q P V R C S A - Y | - - - - - | TAG X (08) SRC Q - V                  | - - - - - | DPA - S - G                         |
| gi_291223817_Saccoglossus_kowalevskii             | LFDEYFTSX (07) P                                                       | - - - - -     | FY LX (03) ER L QGT R C S L - E    | - - - - - | IT GX (08) AQ CT - I                  | - - - - - | NRR - T - G                         |
| gi_291223807_Saccoglossus_kowalevskii             | VFDEYPTSX (03) T                                                       | - - - - -     | FY FX (03) GR TE P T R C S E - S   | - - - - - | VT GX (09) TK CN - T                  | - - - - - | DPD - S - G                         |
| gi_291222847_Saccoglossus_kowalevskii             | LFDEYPTX (03) H                                                        | - - - - -     | FY LX (02) GK AE P T R C S E - T   | - - - - - | IT GX (07) RI CD - L                  | - - - - - | DTT - DLRS                          |
| gi_198421549_Ciona_intestinalis                   | VYDEYASEX (03) P                                                       | - - - - -     | FY YX (07) PY ME A T R C PL - A    | - - - - - | LG GX (13) EH CT - S                  | - - - - - | DPN - N - NF                        |
| gi_321460553_Daphnia_pulex                        | IFDEYGTGX (05) L                                                       | - - - - -     | FFRX (05) - F I E P N I C A N - K  | - - - - - | KIM X (10) AACK - I                   | - - - - - | DPA - T - N                         |
| gi_291231970_Saccoglossus_kowalevskii             | VYDEYGGX (05) L                                                        | - - - - -     | FY AX (04) - Q I E A T R C S T - A | - - - - - | VT GX (08) LE CD - V                  | - - - - - | - V - G - N                         |
| gi_321460551_Daphnia_pulex                        | IFDEYGTGX (05) L                                                       | - - - - -     | FY RX (05) - L I E P N I C A N - Y | - - - - - | PT MX (10) ASC Q - T                  | - - - - - | DLA - T - N                         |
| gi_260786375_Branchiostoma_floridae               | VFDEFATRX (03) L                                                       | - - - - -     | FY QX (03) GSHSPTLCTT - H          | - - - - - | IR AX (07) EE CH - P                  | - - - - - | GD - - - - -                        |
| gi_196007642_Trichoplax_adhaerens                 | VFDEYAVSX (03) L                                                       | - - - - -     | GF IX (03) GN I NEN K C T A - Q    | - - - - - | IE GX (08) KK CN - Y                  | - - - - - | - - - - -                           |
| gi_196007110_Trichoplax_adhaerens                 | IYDEESKGX (03) T                                                       | - - - - -     | YLN X (03) SQ Y E P V K C S S - S  | - - - - - | LKV X (07) TK CS - I                  | - - - - - | NPN - S - GS                        |
| gi_115963085_Strongylocentrotus_purpuratus        | LFNEYPPDX (08) H                                                       | - - - - -     | FY QX (05) QR WK P V I C S Q - E   | - - - - - | YEV X (14) GT CS - G                  | - - - - - | NSA - I - G                         |
| gi_321460554_Daphnia_pulex                        | VFDEYGVNX (02) P                                                       | - - - - -     | LHPX (09) AE I LPT S CTN - EP      | - - - - - | LKG X (07) - - - - -                  | - - - - - | - - - - -                           |
| gi_115650848_Strongylocentrotus_purpuratus        | VFDEYVVPX (05) P                                                       | - - - - -     | YY QX (08) GV FEG T R C S S - K    | - - - - - | VL GX (07) RQ CR - Q                  | - - - - - | DPS - - - - G                       |
| gi_328707920_Acyrthosiphon_pisum                  | VFDEYGYAX (07) -                                                       | - - - - -     | CY AX (03) SPA EVNGCS - D          | - - - - - | K - P ISX (02) RACD - S               | - - - - - | I - - - - -                         |
| gi_270012532_Tribolium_castaneum                  | VFDEYGYAX (07) C                                                       | - - - - -     | FY DX (03) KQ AK AT G C S D - L    | - - - - - | P ISX (02) GI CT - S                  | - - - - - | GAS - - - - -                       |
| gi_301604098_Xenopus_tropicalis                   | VFDEYNSDX (01) P                                                       | - - - - -     | YY IX (03) LT I E A T R C S V - H  | - - - - - | VNG X (14) RT CK - Y                  | - - - - - | DPH - T - N                         |
| gi_149636524_Ornithorhynchus_anatinus             | VFDEYDMNX (01) P                                                       | - - - - -     | FY FX (03) KT I E A T R C S I - G  | - - - - - | IE GX (14) RL CR - S                  | - - - - - | DDQ - T - G                         |
| gi_118094412_Gallus_gallus                        | VFDEYDNDX (01) P                                                       | - - - - -     | FY VX (03) NQ V K V T R C S S - D  | - - - - - | LT GX (11) GS CV - I                  | - - - - - | NKL - T - G                         |
| gi_72168566_Strongylocentrotus_purpuratus         | LFDEYHTDX (05) K                                                       | - - - - -     | FY AX (03) GE I V A T R C T D - Q  | - - - - - | LNG X (08) AP CQ - R                  | - - - - - | DRD - T - G                         |
| gi_260807874_Branchiostoma_floridae               | LFDEYGMDX (08) Y                                                       | - - - - -     | FY SX (04) - G V Q A T R C S A - H | - - - - - | LT GX (08) RP CQ - I                  | - - - - - | DPN - T - G                         |
| gi_291242943_Saccoglossus_kowalevskii             | LFDEYGMGX (05) D                                                       | - - - - -     | YY IX (03) GT LLPTACMK - D         | - - - - - | PVG X (08) KP CR - K                  | - - - - - | NKK - T - G                         |
| gi_291223811_Saccoglossus_kowalevskii             | LFDEYATDX (03) H                                                       | - - - - -     | FY LX (04) - H V E P T R C S R - H | - - - - - | VSG X (08) KR CN - R                  | - - - - - | KPE - N - GV                        |
| gi_291239167_Saccoglossus_kowalevskii             | VFDEYPTX (03) H                                                        | - - - - -     | FY YX (03) GH V QPS R C S E - A    | - - - - - | VT GX (09) KE CN - K                  | - - - - - | DPS - S - GV                        |
| gi_260810520_Branchiostoma_floridae               | VFDEYSSPX (03) R                                                       | - - - - -     | FY MX (04) - G I KPT Q C S A - K   | - - - - - | IP GX (10) WT CR - M                  | - - - - - | NHS - S - G                         |
| gi_291239807_Saccoglossus_kowalevskii             | VYDEYGGX (05) Y                                                        | - - - - -     | FY AX (04) - D I E A T R C S T - A | - - - - - | VT GX (08) QP CA - F                  | - - - - - | - V - N - N                         |
| gi_260793444_Branchiostoma_floridae               | VFDEYGIPIX (05) N                                                      | - - - - -     | FY FX (03) GR ITVTGCKI - N         | - - - - - | TR GX (08) GR CS - M                  | - - - - - | DSA - T - G                         |
| gi_291242484_Saccoglossus_kowalevskii             | LFDEYTVDX (04) H                                                       | - - - - -     | FY FX (03) GELRPVACHP - R          | - - - - - | IT GX (02) - PCE - D                  | - - - - - | RG A - D - E                        |
| gi_291229678_Saccoglossus_kowalevskii             | VYDEYTPSX (04) Y                                                       | - - - - -     | FY AX (04) - Q I E A T R C S L - A | - - - - - | VT GX (02) - - - - -                  | - - - - - | - - - - -                           |
| gi_291223815_Saccoglossus_kowalevskii             | LFDEYVVDX (04) H                                                       | - - - - -     | FY LX (03) - ELLPVACHS - L         | - - - - - | IS GX (02) - PCS - D                  | - - - - - | RG A - D - G                        |
| gi_196007112_Trichoplax_adhaerens                 | IYDEESKGX (03) L                                                       | - - - - -     | YRD X (03) NR FKPIQCS - R          | - - - - - | LKV X (07) KT CS - Y                  | - - - - - | NPV - S - GS                        |
| gi_72152222_Strongylocentrotus_purpuratus         | LFDEYPSLX (04) N                                                       | - - - - -     | FY IX (03) GR L QGNKCS - E         | - - - - - | IV GX (23) IS CQ - V                  | - - - - - | PE - G - E                          |
| gi_195998007_Trichoplax_adhaerens                 | VFEEYAMRX (03) L                                                       | - - - - -     | VY LX (03) GK L QTT R C S A - S    | - - - - - | LT GX (08) QI CK - L                  | - - - - - | - - - - -                           |
| gi_198419444_Ciona_intestinalis                   | VFDEYTTX (03) P                                                        | - - - - -     | YY YX (04) - TV Q A T R C PS - T   | - - - - - | LD GX (12) RD CQ - R                  | - - - - - | NLE - N - G                         |
| gi_198415894_Ciona_intestinalis                   | VFDEYATRX (03) S                                                       | - - - - -     | HY VX (04) - VL QGT R C PK - S     | - - - - - | LR GX (10) NL CE - V                  | - - - - - | NRT - T - G                         |
| gi_260786377_Branchiostoma_floridae               | VFDEYNYEX (01) P                                                       | - - - - -     | FY VX (03) KN I E A T R C S A - D  | - - - - - | II GX (11) - NC I - R                 | - - - - - | DPQ - T - G                         |
| gi_338161004_Xenopus_laervis                      | VFDEYNYNX (01) P                                                       | - - - - -     | YY FX (03) RK VE A T R C PL - K    | - - - - - | LKG X (14) EP CE - Y                  | - - - - - | DKN - T - G                         |
| gi_301609308_Xenopus_tropicalis                   | VYDEYPEEX (03) H                                                       | - - - - -     | FY YX (03) GNV QPT R C S E - A     | - - - - - | VT GX (09) KE CN - T                  | - - - - - | DPS - S - GV                        |
| gi_291222148_Saccoglossus_kowalevskii             | VFDEYPTHX (03) Y                                                       | - - - - -     | FY VX (03) GK I E A T R C S L - Q  | - - - - - | IK GX (08) KD CD - F                  | - - - - - | RNI - T - K                         |
| gi_291223809_Saccoglossus_kowalevskii             | VFDEYGYQX (06) L                                                       | - - - - -     | FY KX (03) - E I Q V N L C S D - T | - - - - - | PI IX (09) GP CK - I                  | - - - - - | DPA - T - G                         |
| gi_321460550_Daphnia_pulex                        | VFDEYGYQX (06) L                                                       | - - - - -     | FY KX (03) - E I Q V N L C S D - T | - - - - - | PI IX (09) GP CK - I                  | - - - - - | DPA - T - G                         |
| gi_321478616_Daphnia_pulex                        | VFDEYGYQX (06) L                                                       | - - - - -     | FY KX (03) - E I Q V N L C S D - T | - - - - - | PI IX (09) GP CK - I                  | - - - - - | DPA - T - G                         |
| gi_241581081_Ixodes_scapularis                    | VFDEYGAAX (04) -                                                       | - - - - -     | NL LX (02) DQ V RANACS - V         | - - - - - | MR FX (07) EP CR - V                  | - - - - - | YRG - C - KV                        |
| gi_291224467_Saccoglossus_kowalevskii             | VYDEYGGX (05) Y                                                        | - - - - -     | FY SX (04) - D I E A T R C S T - A | - - - - - | VT GX (08) ADC V - Y                  | - - - - - | I - N - N                           |
| gi_321467441_Daphnia_pulex                        | VFEEHGFXX (07) -                                                       | - - - - -     | FY RX (05) - DV VSS NDT - E        | - - - - - | IK GX (08) - DCE - V                  | - - - - - | DEF - G - I                         |
| gi_198424353_Ciona_intestinalis                   | TFDEKARAX (04) K                                                       | - - - - -     | FY LX (03) RS V KPT I C S S - V    | - - - - - | IP GX (09) SP CN -                    | - - - - - | EK - Q - RL                         |
| gi_198419582_Ciona_intestinalis                   | VFDEYATGX (03) R                                                       | - - - - -     | HY IX (04) - I L Q A T R C PL - S  | - - - - - | LR GX (10) TR CA - V                  | - - - - - | NRS - S - L                         |
| gi_312373778_Anopheles_darlingi                   | VFDEIGYDX (07) -                                                       | - - - - -     | CY IX (03) HK V KLT G C S D - A    | - - - - - | PV NX (02) GL CG - S                  | - - - - - | PSS - P - V                         |
| gi_242023388_Pediculus_humanus_corporis           | IYDEIGYDX (07) -                                                       | - - - - -     | CFHX (03) EK P QVT G C S D - K     | - - - - - | PI NX (01) - VCS - T                  | - - - - - | GDL - I - -                         |
| gi_115749084_Strongylocentrotus_purpuratus        | VFDEYVVPX (05) P                                                       | - - - - -     | YY QX (06) DG FEG T R C S S - E    | - - - - - | VHG X (07) SP CG - Q                  | - - - - - | NTF - - - G                         |
| gi_241672368_Ixodes_scapularis                    | VFNEAGYPX (05) P                                                       | - - - - -     | AY TX (04) - SSDPTD -              | - - - - - | - - - - -                             | - - - - - | - - - - -                           |
| gi_313226492_Oikopleura_dioica                    | VFDSLQQX (01) -                                                        | - - - - -     | - - - - -                          | - - - - - | - - - - -                             | - - - - - | - - - - -                           |
| gi_241998382_Ixodes_scapularis                    | VFPEHASTX (04) -                                                       | - - - - -     | VY CX (03) KRLT -                  | - - - - - | - - - - -                             | - - - - - | - - - - -                           |
| gi_321462270_Daphnia_pulex                        | VFDEYGFEX (05) P                                                       | - - - - -     | LWTX (01) -                        | - - - - - | - - - - -                             | - - - - - | - - - - -                           |
| gi_320352592_Desulfohalobium_propionicum_DSM_2032 | VRDEYESRX (05) -                                                       | NT - - - - -  | - - - - -                          | - - - - - | GN - - AD CPD - A                     | - - - - - | AAGX (09) - QSE - FCWGGN PANLT - DL |
| gi_159898230_Herpetosiphon_aurantiacus_DSM_785    | LHDGYAPDX (07) YC - SS -                                               | - - - - -     | X (02) NDLSAELSHD - R              | - - - - - | LSHX (08) SASK - L                    | - - - - - | RG N - A - -                        |
| gi_260426558_Citreicella_sp._SE45                 | LGEQYDEQX (07) - GI -                                                  | - - - - -     | - - - - -                          | - - - - - | GP - - GFDAG - S                      | - - - - - | IDEX (09) - GRI - QCV -             |
| gi_149919617_Plesiocystis_pacifica_SIR1           | LKDQYFDQX (06) - GI -                                                  | - - - - -     | - - - - -                          | - - - - - | GH - - - - -                          | - - - - - | - - - - -                           |
| gi_114046070_Sewanella_sp._MR7                    | VYDEYKGNX (07) A - T -                                                 | - - - - -     | X (02) TD - - - - -                | - - - - - | VATDSI - MS - X (42) QDVK - D         | - - - - - | DPK - S - GR                        |
| gi_148657095_Roseiflexus_sp._RS1                  | LYDEYRNDX (07) ND - PGAP -                                             | - - - - -     | X (02) DD I - - - -                | - - - - - | PVSPSV - MH - X (40) RRPE - L         | - - - - - | DPR - D - GV                        |
| gi_312879450_Aminomonas_paucivorans_DSM_12260     | LYDEYVATX (06) SW - P -                                                | - - - - -     | X (02) SDVS - - - -                | - - - - - | PSGAAI - MN - X (43) QAPS - Q         | - - - - - | DGV - S - GD                        |
| gi_114321541_Akalimnicola_ehrlichii_MLHE1         | LYDEYEGRX (07) TF - P -                                                | - - - - -     | X (02) GDV - - - -                 | - - - - - | PTSPA I - MN - X (42) QPTT - D        | - - - - - | DPQ - E - GN                        |
| gi_57642113_Thermococcus_kodakarensis_KOD1        | LYDEYLDVX (07) IKD -                                                   | - - - - -     | - - - - -                          | - - - - - | YKMNALKMWFGE - VPPX (08) RYSE - LS    | - - - - - | WPQ - - - DY                        |
| gi_254173443_Thermococcus_sp._AM4                 | LGDEYMDWX (07) Y -                                                     | - - - - -     | - - - - -                          | - - - - - | DLFDPNKL - I -                        | - - - - - | - - - - -                           |
| gi_254172615_Thermococcus_sp._AM4                 | LGDEYMDWX (07) WYY -                                                   | - - - - -     | - - - - -                          | - - - - - | GTLEAAATDSTI - IAGX (31) KWSE - LS    | - - - - - | TPR - - - DY                        |
| gi_163848422_Chloroflexus_aurantiacus_J10f1       | LSDNYIGFX (03) - D - GRRV -                                            | - - - - -     | - - - - -                          | - - - - - | LVGVESCPG - A - MN - X (05) - QSE - F | - - - - - | HPL - A - G                         |
| gi_240103523_Thermococcus_gammatolerans_EJ3       | FWDEYQDWX (07) WYTTQMALY YX (03) SAFDISRI LSDK - LL - X (10) KWSE - LS | - - - - -     | - - - - -                          | - - - - - | - - - - -                             | - - - - - | TPG - - - DY                        |
| gi_309791403_Oscillochloris_trichoides_DG6        | LDDNYIGRX (02) - S - GTM -                                             | - - - - -     | - - - - -                          | - - - - - | ISISTCPG - A - MS - X (05) - YSE - F  | - - - - - | HPR - T - A                         |
| gi_309791671_Oscillochloris_trichoides_DG6        | LDDHYVGRX (03) - - - - -                                               | ALQ - - - - - | - - - - -                          | - - - - - | AVEYDACP - I - MH - X (04) - STE - L  | - - - - - | HPS - A - DW                        |
| gi_309790879_Oscillochloris_trichoides_DG6        | LDEYLGKX (04) - D - GSL -                                              | - - - - -     | - - - - -                          | - - - - - | LVPTTGCS - A - MY - X (06) - SSE - F  | - - - - - | RPS - S - D                         |
| gi_159898060_Herpetosiphon_aurantiacus_DSM_785    | LRDQYINSX (07) - - - - -                                               | - - - - -     | LALX (03) - NPTAESIMA - H          | - - - - - | LVGX (14) QPFR - A                    | - - - - - | QTG - A - G                         |

|                                                   | 280     | 290           | 300         | 310          | 320          | 330          | 340          |           |         |
|---------------------------------------------------|---------|---------------|-------------|--------------|--------------|--------------|--------------|-----------|---------|
| gi_110611231_Homo_sapiens_I25-K262                | LY-EKG  | CEFLVX (03)   | QTEK-ASIMF  | A-Q-HV       | DS-IV        | EFCX (03)    | NHNKEAPNK    |           |         |
| gi_5729769_Homo_sapiens_V33-A262                  | LF-KEG  | CTFIYX (03)   | QNAT-ASIMF  | M-Q-SL       | SS-VV        | EFCX (03)    | THNQ-E-A     |           |         |
| gi_74721541_Homo_sapiens_V24-L262                 | LY-EAK  | CTFIPX (03)   | QTAK-ESIVF  | M-Q-NL       | DS-VT        | EFCX (03)    | THNKEAPNL    |           |         |
| gi_205831469_Homo_sapiens_I24-L262                | LY-GKD  | CQFFPX (03)   | QTEK-ASIMF  | M-Q-SI       | DS-VV        | EFCX (03)    | THNQEAPS     |           |         |
| gi_157818579_Rattus_norvegicus                    | LY-KDN  | CVFIPX (03)   | QREK-ASIMF  | N-Q-NI       | NS-VV        | EFCX (03)    | NHNKEA-P     |           |         |
| gi_126306129_Monodelphis_domestica                | KL-NKG  | CKFIPX (03)   | QTEK-ASIMF  | M-Q-SI       | NS-VV        | EFCX (03)    | NHNKDA-P     |           |         |
| gi_301609304_Xenopus_tropicalis                   | LY-EDD  | CVFVPX (03)   | QSVK-ESIMY  | L-Q-AL       | PS-VS        | EFCX (02)    | KHNTEA-P     |           |         |
| gi_327270784_Anolis_carolinensis                  | LY-EVG  | CQFIPX (03)   | QTVP-ASIMY  | M-Q-SL       | PS-VI        | RFCX (03)    | NHN-IN-A     |           |         |
| gi_301768028_Ailuropoda_melanoleuca               | LF-KEG  | CMFIYX (03)   | QNAT-ASIMF  | M-Q-SL       | SS-VV        | EFCX (03)    | THNQEA-P     |           |         |
| gi_198415896_Ciona_intestinalis                   | LPASDT  | CHFI PX (05)  | RGLK-TSMMF  | Y-S-YL       | SS-VI        | EFCX (09)    | QHNT-E-A     |           |         |
| gi_326674112_Danio_rerio                          | LP-SSD  | CKFFPX (03)   | QNTD-SSVMF  | S-P-SL       | EA-VT        | TFCX (03)    | EHNY-E-A     |           |         |
| gi_291221810_Saccoglossus_kowalevskii             | LP-PPE  | CKFIPX (05)   | QQVT-ASIMY  | A-Q-WI       | NT-IA        | SFCX (02)    | NSSE-P       |           |         |
| gi_260795693_Branchiostoma_floridae               | VY-ESE  | CRFY PX (04)  | NRAT-GSYM F | M-Q-FL       | SQ-VT        | SFCX (10)    | YHNREA-P     |           |         |
| gi_198417752_Ciona_intestinalis                   | LPNSTD  | CKFILX (05)   | LDLK-ASIMS  | Y-Q-YV       | NE-IN        | GFCX (09)    | RHNREA-P     |           |         |
| gi_291242482_Saccoglossus_kowalevskii             | LP-LPD  | CVFHPX (07)   | LPIK-SSIMF  | A-Q-WI       | HG-VE        | EFCX (09)    | FHNREA-P     |           |         |
| gi_115964593_Strongylocentrotus_purpuratus        | Y-DRD   | CRFVPX (04)   | QTAN-ASLLF  | GTRDA        | HI-HS        | IE-KFCX (09) | LHNPLA-P     |           |         |
| gi_196006922_Trichoplax_adhaerens                 | PY-TAD  | CVFLPX (03)   | SVPS-GSIMY  | D-H-NI       | PS-VL        | HFCX (09)    | YH-NTL-P     |           |         |
| gi_321455024_Daphnia_pulex                        | A-DST   | CEFVAX (04)   | PDIR-SSLMY  | R-P-DL       | DH-ME        | KFCX (03)    | NHDDSV-P     |           |         |
| gi_291398577_Oryctolagus_cuniculus                | LY-EAK  | CTFIPX (03)   | QLAK-ESIMF  | M-Q-NL       | DS-VT        | EFCX (03)    | THNTEA-P     |           |         |
| gi_149636528_Ornithorhynchus_anatinus             | LL-EKH  | CTFIPX (03)   | QTVT-SSLMY  | M-Q-SF       | ES-VV        | EFCX (03)    | NHNAEA-P     |           |         |
| gi_148680070_Mus_musculus                         | LY-EKD  | CQFFPX (03)   | QSEK-ASIMF  | M-E-SI       | DS-VT        | EFCX (03)    | NHNREA-P     |           |         |
| gi_118094354_Gallus_gallus                        | LY-EAG  | CVFVPX (03)   | QNSK-NSIMY  | M-Q-SL       | PS-VV        | EFCX (03)    | THNSEA-P     |           |         |
| gi_327270788_Anolis_carolinensis                  | LY-EPG  | CLFIPX (03)   | QTSI-ASIMF  | M-Q-SL       | SS-VS        | QFCX (03)    | NHNLMA-P     |           |         |
| gi_260796397_Branchiostoma_floridae               | LP-EAD  | CRFIPX (04)   | NRAT-GSYM F | M-Q-FL       | PQ-VE        | EFCX (17)    | SHNREA-P     |           |         |
| gi_291223817_Saccoglossus_kowalevskii             | LP-EEE  | CLFFPX (04)   | QKAT-ASVMF  | A-Q-YL       | DP-VT        | SWCX (09)    | LHNREA-P     |           |         |
| gi_291223807_Saccoglossus_kowalevskii             | LP-EPT  | CLFY PX (04)  | NPAK-ASYLY  | A-Q-YL       | EG-VV        | DFCX (10)    | RHN-QI-A     |           |         |
| gi_291222847_Saccoglossus_kowalevskii             | LD-KRE  | CRFY PX (03)  | NTGT-GSYLY  | V-T-YV       | DS-VT        | DFCX (10)    | RHNSFA-P     |           |         |
| gi_198421549_Ciona_intestinalis                   | LP-LEG  | CLFFPX (07)   | DDLS-ASLLS  | H-Q-FV       | DQ-VV        | DFCX (09)    | LHNKEA-P     |           |         |
| gi_321460553_Daphnia_pulex                        | IY-DQN  | CRFEFX (03)   | FKPD-TSLAS  | Y-H-LL       | DS-VV        | HFCX (06)    | SHRSET-P     |           |         |
| gi_291231970_Saccoglossus_kowalevskii             | LP-EPD  | CRFYDX (04)   | RSYT-GSLMY  | R-Q-YL       | PN-IV        | HFCX (11)    | IHNQA-P      |           |         |
| gi_321460551_Daphnia_pulex                        | LY-DDN  | CRFQLX (03)   | FLPE-TSLAS  | Y-H-QI       | KS-VV        | HFCX (03)    | QA-H         |           |         |
| gi_260786375_Branchiostoma_floridae               | ER-TRV  | CHYEFX (03)   | TSAQ-ASVMF  | H-P-EL       | PT-VT        | DFCX (08)    | YH-NFH-A     |           |         |
| gi_196007642_Trichoplax_adhaerens                 | PY-GSN  | CVYSVX (03)   | KGSK-GSIMF  | D-Q-NI       | DS-VN        | TFCX (03)    | NSN-P        |           |         |
| gi_196007110_Trichoplax_adhaerens                 | V-HFL   | CRPRVX (03)   | PIAA-GSIMY  | E-Y-RM       | DG-LE        | HFCX (12)    | RHNSLP-P     |           |         |
| gi_115963085_Strongylocentrotus_purpuratus        | Y-ETG   | CI VRIX (03)  | DQAS-GSIMN  | G-PLTY       | SN-IV        | NFCX (09)    | LHNREA-P     |           |         |
| gi_321460554_Daphnia_pulex                        |         | QNSX (03)     | GNIT-SSIMF  | N-T-DL       | PS-IN        | RLCX (03)    | NHLKAP-P     |           |         |
| gi_115650848_Strongylocentrotus_purpuratus        | L-PDS   | CRFVPX (04)   | QTAR-ASLMF  | A-S-NI       | H-           |              | S            |           |         |
| gi_328707920_Acyrtosiphon_pisum                   |         | NTTAX (03)    | PEAK-TSLMF  | S-T-A        | SQ-VT        | KFCX (03)    | SHDRYA-P     |           |         |
| gi_270012532_Tribolium_castaneum                  | V-AY    | NTSKX (03)    | EKAR-SSIMF  | A-A-EA       | PQ-VS        | MFCX (03)    | NHDRYA-P     |           |         |
| gi_301604098_Xenopus_tropicalis                   | LF-EKG  | CQFFPX (03)   | QLTR-ESIMH  | M-Q-AL       | PS-VS        | EFCX (03)    | NHNEA-P      |           |         |
| gi_149636524_Ornithorhynchus_anatinus             | LY-EAK  | CVFIPX (03)   | QEEK-SSLMF  | M-Q-SL       | DS-VT        |              | K            |           |         |
| gi_118094412_Gallus_gallus                        | LF-KEG  | CAFI PX (03)  | QTAV-SSIMY  | M-Q-SL       | SS-VA        | EFCX (03)    | NHNREA-P     |           |         |
| gi_72168566_Strongylocentrotus_purpuratus         | LY-EDD  | CFYFPX (04)   | QTSP-GSIMY  | A-Q-FL       | DS-VT        | GFCX (07)    | YHNREA-P     |           |         |
| gi_260807874_Branchiostoma_floridae               | LP-EPA  | CRFAPX (05)   | NPAT-GSYM F | M-Q-FL       | EK-VA        | SFCX (10)    | LHNHEA-P     |           |         |
| gi_291242943_Saccoglossus_kowalevskii             | LY-GKD  | CVFY PX (04)  | NTMP-ASIMF  | M-Q-FL       | ES-VD        | KYCX (03)    | THNREA-P     |           |         |
| gi_291223811_Saccoglossus_kowalevskii             | LP-NKW  | CRFY PX (06)  | QNAT-GSYM H | M-N-FL       | DT-VT        | EFCX (10)    | LHNSMA-P     |           |         |
| gi_291239167_Saccoglossus_kowalevskii             | LP-DSG  | CRFY PX (04)  | NEAT-GSYM Y | A-N-YL       | DS-VF        | TYCX (10)    | RHN-RL-A     |           |         |
| gi_260810520_Branchiostoma_floridae               | IY-EET  | CHFN VX (04)  | NEAT-GSYM C | Y-Q-YL       | AE-VT        | DFCX (10)    | YHNREA-P     |           |         |
| gi_291239807_Saccoglossus_kowalevskii             | YP-EDD  | CYFYDX (04)   | ATFT-GSLMY  | R-Q-YL       | P-           |              | Q            |           |         |
| gi_260793444_Branchiostoma_floridae               | LP-DSE  | CQFFPX (05)   | GSGH-GSVMY  | M-Q-FL       | DA-VD        | HFCX (07)    | AHNADA-P     |           |         |
| gi_291242484_Saccoglossus_kowalevskii             | LP-LPD  | CVFHPX (07)   | LPIK-SSIMF  | A-Q-WI       | DA-VE        | EFCX (09)    | YHNREA-P     |           |         |
| gi_291229678_Saccoglossus_kowalevskii             |         |               |             |              | VV-DF        |              | C            |           |         |
| gi_291223815_Saccoglossus_kowalevskii             | LP-LPE  | CI FRA X (06) | DWIK-SSIMF  | A-Q-WI       | KS-VE        | EFCX (09)    | KH-N-R       |           |         |
| gi_196007112_Trichoplax_adhaerens                 | GL-KVG  | CRIVVX (03)   | SLAA-GSIMY  | E-Y-RV       | DG-IE        | HFCX (01)    | D            |           |         |
| gi_72152222_Strongylocentrotus_purpuratus         | LP-PHQ  | CRFRPX (05)   | QTAT-GSIMY  | S-T-HI       | PS-IR        | SFCX (10)    | LHSSEA-P     |           |         |
| gi_195998007_Trichoplax_adhaerens                 | YP-SDQ  | CKFSAX (03)   | SMAT-ASIML  | D-P-HL       | NG-IS        | EFCX (09)    | LHNR-Q-A     |           |         |
| gi_198419444_Ciona_intestinalis                   | LM-EDG  | CLFLPX (05)   | ADLT-TSLMS  | H-Q-YL       | SQ-VT        | MFCX (09)    | HHNREA-P     |           |         |
| gi_198415894_Ciona_intestinalis                   | LPQTD   | CAFYVX (05)   | PELN-TSMMS  | H-S-YV       | QQ-VV        | EFCX (09)    | QHNT-E-A     |           |         |
| gi_260786377_Branchiostoma_floridae               |         |               |             |              |              |              | V            |           |         |
| gi_338161004_Xenopus_laervis                      | LY-EDG  | CVFVPX (03)   | QAAK-SSIMY  | S-Q-AL       | PS-VT        | EFCX (02)    | NHNTEA-P     |           |         |
| gi_301609308_Xenopus_tropicalis                   | LY-EED  | CKFY PX (03)  | ILVE-ESVMY  | A-Q-MF       | EP-VH        | AFCX (03)    | SHNSEA-P     |           |         |
| gi_291222148_Saccoglossus_kowalevskii             | MP-STG  | CRFFPX (04)   | NEAT-ASYMY  | A-N-YL       | DS-VV        | TFCX (10)    | KHN-RL-A     |           |         |
| gi_291223809_Saccoglossus_kowalevskii             | LQ-KAD  | CHFI PX (04)  | ASDS-ASLMY  | M-Q-FL       | PT-IT        | GFCX (10)    | YHNREA-P     |           |         |
| gi_321460550_Daphnia_pulex                        | VY-DNN  | CAYQLX (03)   | FLPD-SSLMS  | V-H-SL       | DS-VV        | DFCX (06)    | SHVFA-P      |           |         |
| gi_321478616_Daphnia_pulex                        | LY-DTN  | CTYSFX (03)   | FKPE-SSIMS  | DY-R-ML      | PS-AM        | HFCX (08)    | KHNRQA-P     |           |         |
| gi_241581081_Ixodes_scapularis                    | ST-KCN  | AKFYQX (03)   | DPVE-SSIMF  | M-P-YI       | AG-VS        | QFCX (05)    | KHNI FA-P    |           |         |
| gi_291224467_Saccoglossus_kowalevskii             | YP-EDD  | CRFYDX (01)   | GSFT-GSLMY  | R-Q-YL       | SQ-LI        | HFCX (11)    | IHNVES-P     |           |         |
| gi_321467441_Daphnia_pulex                        | ISNQQE  | CRFI PX (04)  | QTAT-TSLMS  | F-H-WL       | DS-VI        | SFSX (03)    | KHDKPP-P     |           |         |
| gi_198424353_Ciona_intestinalis                   | F-DNS   | CVFVPX (05)   | EKTY-ASLLY  | R-A-DL       | PY-VN        | DFCX (10)    | KHDEEA-P     |           |         |
| gi_198419582_Ciona_intestinalis                   | LP LTEN | CYFFPX (05)   | RGLN-SSMMS  | F-S-YL       | HS-VE        | AFCX (09)    | FHNS-E-A     |           |         |
| gi_312373778_Anopheles_darlingi                   | PV-PY   | NISR X (03)   | ANAR-TSIMF  | A-A-EA       | KS-VT        | MFCX (03)    | THNRYA-P     |           |         |
| gi_242023388_Pediculus_humanus_corporis           | G-SY    | NTSR X (03)   | PDAT-KSILF  | A-A-T        | SK-VN        | KFCX (03)    | THDAFA-P     |           |         |
| gi_115749084_Strongylocentrotus_purpuratus        | L-PDS   | CRFVTX (06)   | QTAK-ASLMF  | A-S-NI       | HS-ID        | MFCX (08)    | YHNREA-P     |           |         |
| gi_241672368_Ixodes_scapularis                    |         |               |             |              | V-V          | X (01)       | TCTDT-P      |           |         |
| gi_313226492_Oikopleura_dioica                    |         | C             |             |              |              |              | KKFKE-E      |           |         |
| gi_241998382_Ixodes_scapularis                    |         |               |             |              |              | X (03)       | STVSSR-P     |           |         |
| gi_321462270_Daphnia_pulex                        |         |               |             |              |              |              | QYGS-H       |           |         |
| gi_320352592_Desulfohalobium_propionicum_DSM_2032 | T-GG    | NHD-ATN       | -X (07)     | R-NN         | R-S-CWX (08) | NT-IL        | AP-X (04)    | DPAAHG-A  |         |
| gi_159898230_Herpetosiphon_aurantiacum_DSM_785    | AQ-HYH  | CDN           | -TP         | QTLMY-AM     | D-DWX (03)   | QT-LY        | GLVX (05)    | SVMAHN-G  |         |
| gi_260426558_Citreicella_sp._SE45                 | G-GG    | N-D-G         | -X (03)     | L-RG         | S-D          |              | X (03)       | GSQFV-L   |         |
| gi_149919617_Plesiocystis_pacifica_SIR1           |         |               |             |              |              | G            | VD-DV        | X (03)    | HNSIL-Q |
| gi_114046070_Shewanella_sp._MR7                   | K-TA    | QPTR          | RYTTX (03)  | NAPD-ASNPV   | K-T-EL       | PA-AQ        | SSCX (06)    | VWVEGD-I  |         |
| gi_148657095_Roseiflexus_sp._RS1                  | L-AY    | YPRRL         | YHPX (03)   | NVAP-ASGQ    | L-P-RI       | DL-ITG       | H-X (03)     | SMLQII-W  |         |
| gi_312879450_Aminomonas_paucivorans_DSM_12260     | T-TV    | KPSRV         | QYSFX (03)  | V-TTS        | G-D-YL       | NA-VT        | PGTHLAX (04) | NLKI LW-L |         |
| gi_114321541_Alkalilimnicola_ehrlichii_MLHE1      | E-TV    | QPDR          | TRYTAX (03) | VAPTAADNWV   | V-T-QL       | DQ-MD        | HGCX (06)    | VWMDD-L   |         |
| gi_57642113_Thermococcus_kodakarensis_KOD1        | ARF     | NST           | LTEMFX (13) | -VS          | R-S-CWX (24) | PSI          | -X (03)      | MPFSSM-Y  |         |
| gi_254173443_Thermococcus_sp._AM4                 | F-RSD   | AWWFYX (02)   | NVPP-Y SVMN | N-A-HRX (14) | NKKE         | RFKX (03)    | EHMTDQ-W     |           |         |
| gi_254172615_Thermococcus_sp._AM4                 | EKF     | KKD           | ASELWX (29) | STTD-YGIWH   | C-S-AW       | EA-VY        | SF-X (02)    | DHNTPT-W  |         |
| gi_163848422_Chloroflexus_aurantiacus_J10f1       | -W      | TTN           | CQTLX (03)  | E-NG         | R-A-DWX (24) | NTLPA        | Q-X (03)     | VIEMPL-A  |         |
| gi_240103523_Thermococcus_gammatolerans_EJ3       | SSF     | KED           | AIYIWX (24) | NLTH-KDKWH   | C-S-SW       | EA-LF        | KF-X (02)    | GYDRPE-W  |         |
| gi_309791403_Oscillochloris_trichoides_DG6        | AW      | DAN           | CSRTFX (03) | E-LQ         |              |              | -X (03)      | WETIKR-F  |         |
| gi_309791671_Oscillochloris_trichoides_DG6        | LGG     | DPN           | CAVTLX (03) | V-TG         | G-S-DW       |              | -X (03)      | HYPALN-A  |         |
| gi_309790879_Oscillochloris_trichoides_DG6        | -W      | SSA           | CQTLX (03)  | G-SG         |              | MS           | E-X (01)     | GSITHF-Y  |         |
| gi_159898060_Herpetosiphon_aurantiacum_DSM_785    | LPYSA   | MATAPX (04)   | RVGP-ERL    | P-L-PL       | PL-FQH       | SFGX (07)    | INLPIA-E     |           |         |
