# Supplementary material for: CLCAs - A Family of Metalloproteases of Intriguing Phylogenetic Distribution and with Cases of Substituted Catalytic Sites
Source: PubMed Central journal article supplement (PMC3650047; doi:10.1371/journal.pone.0062272), 2013-05-09

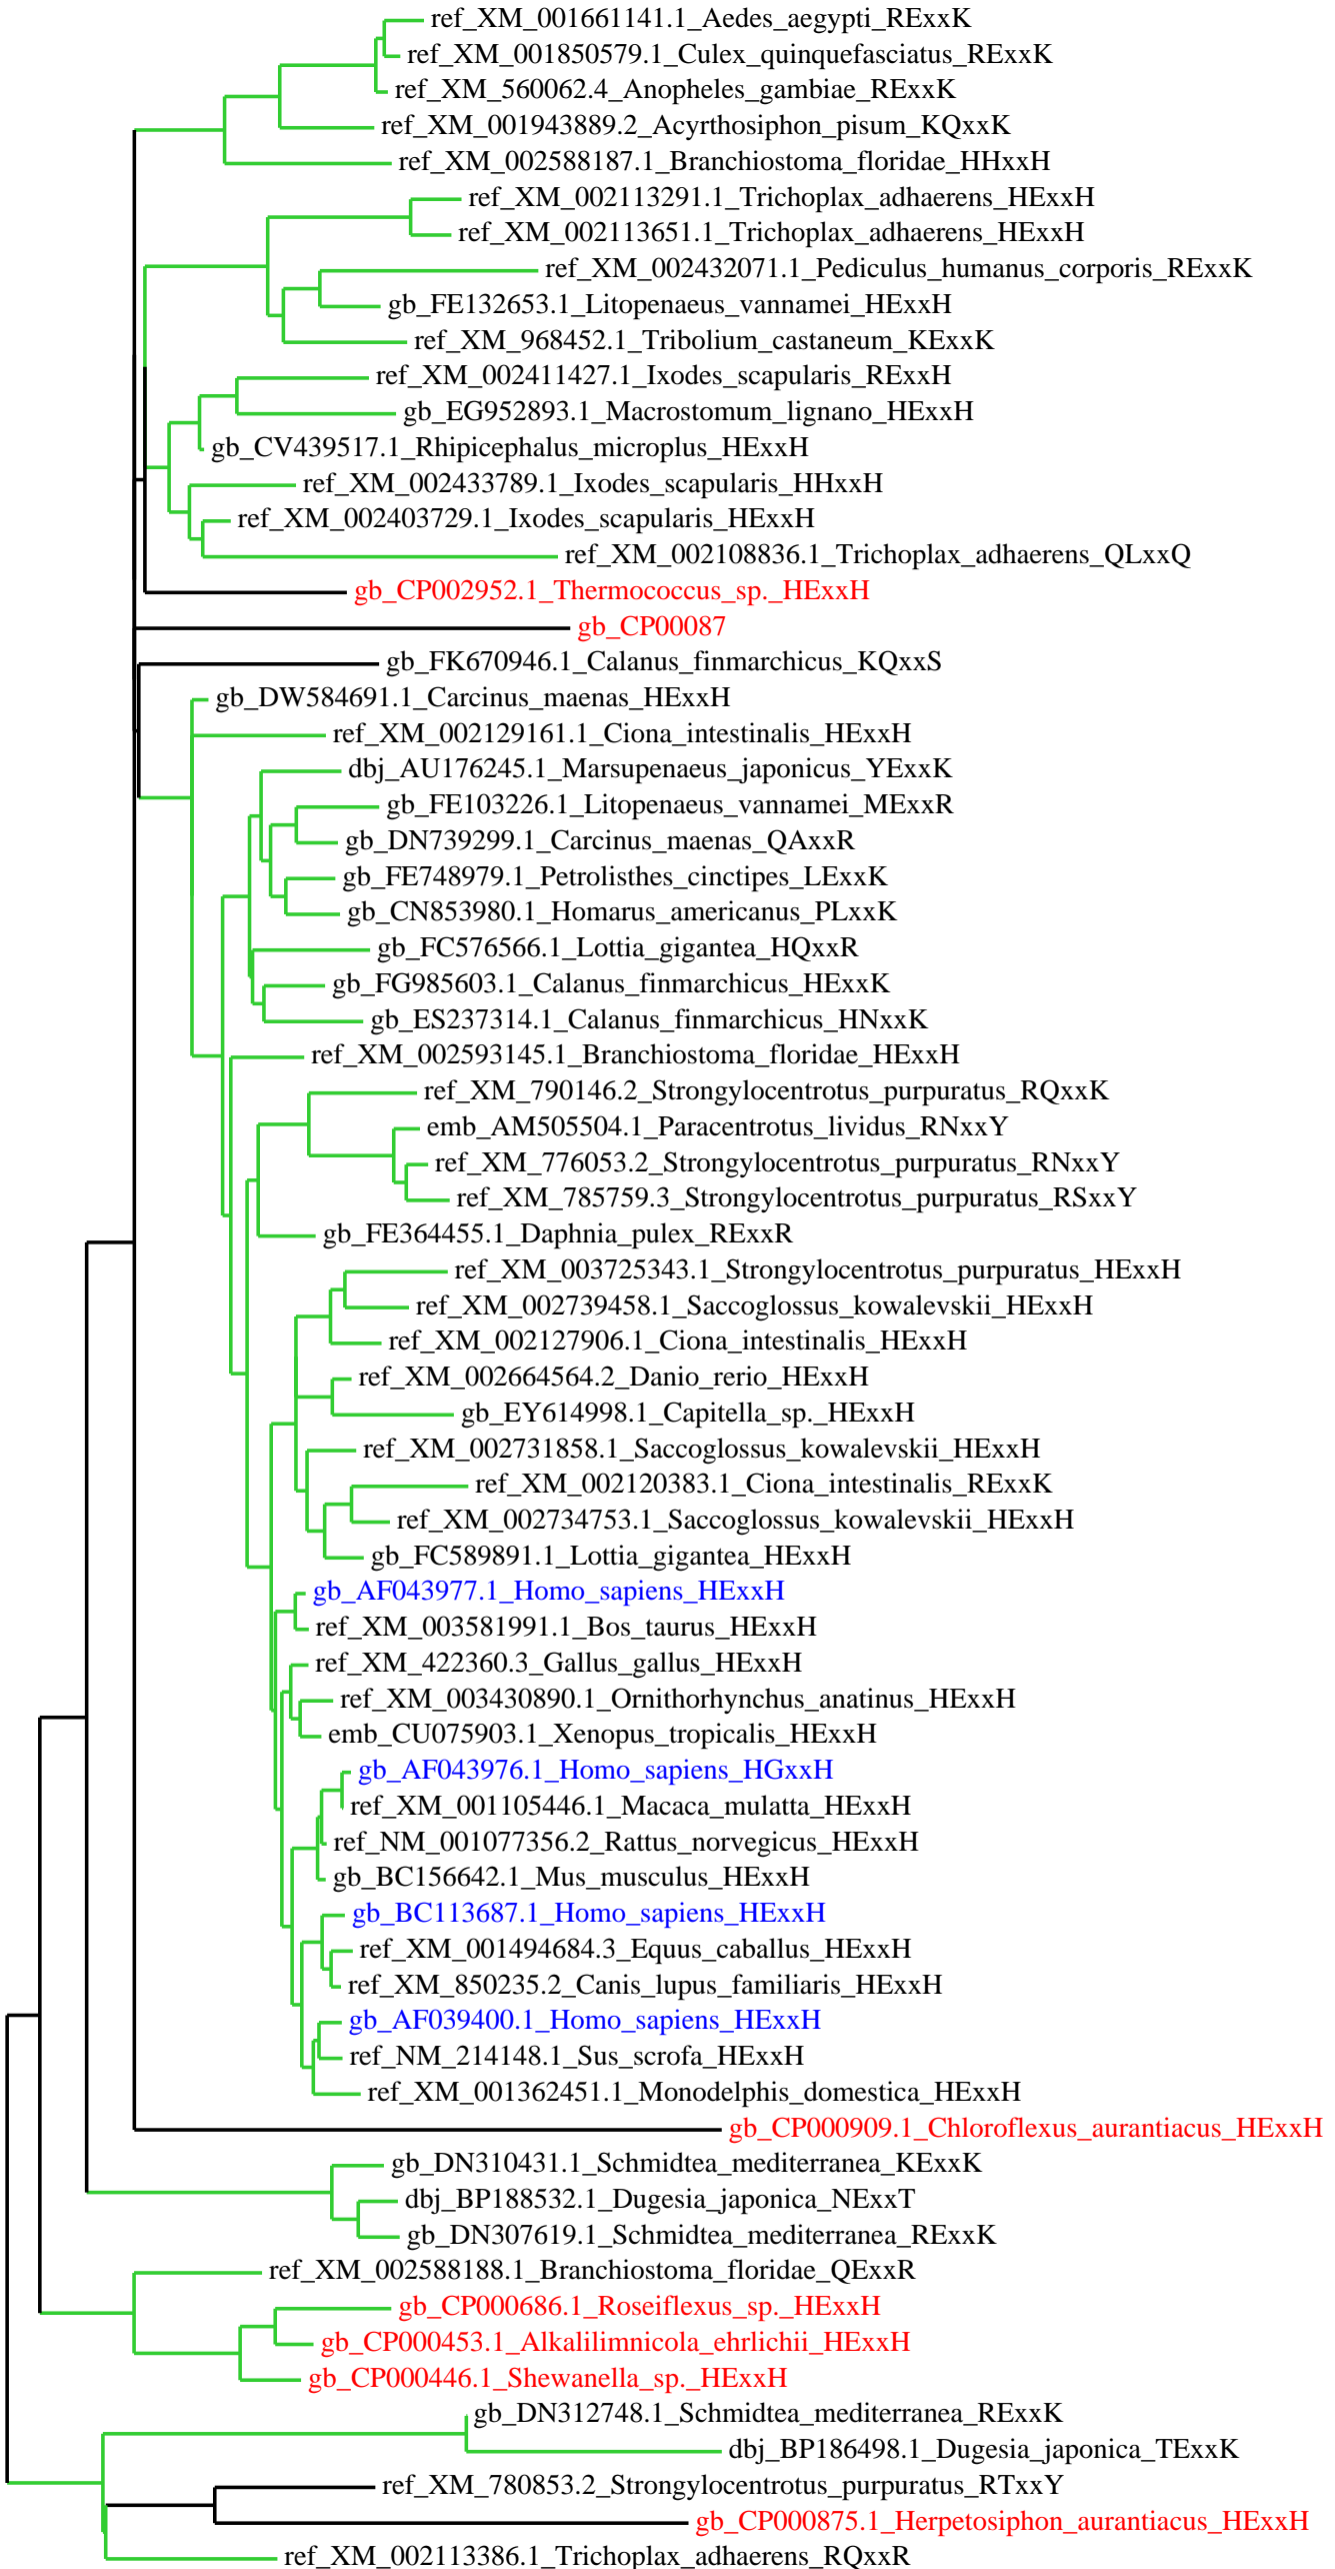

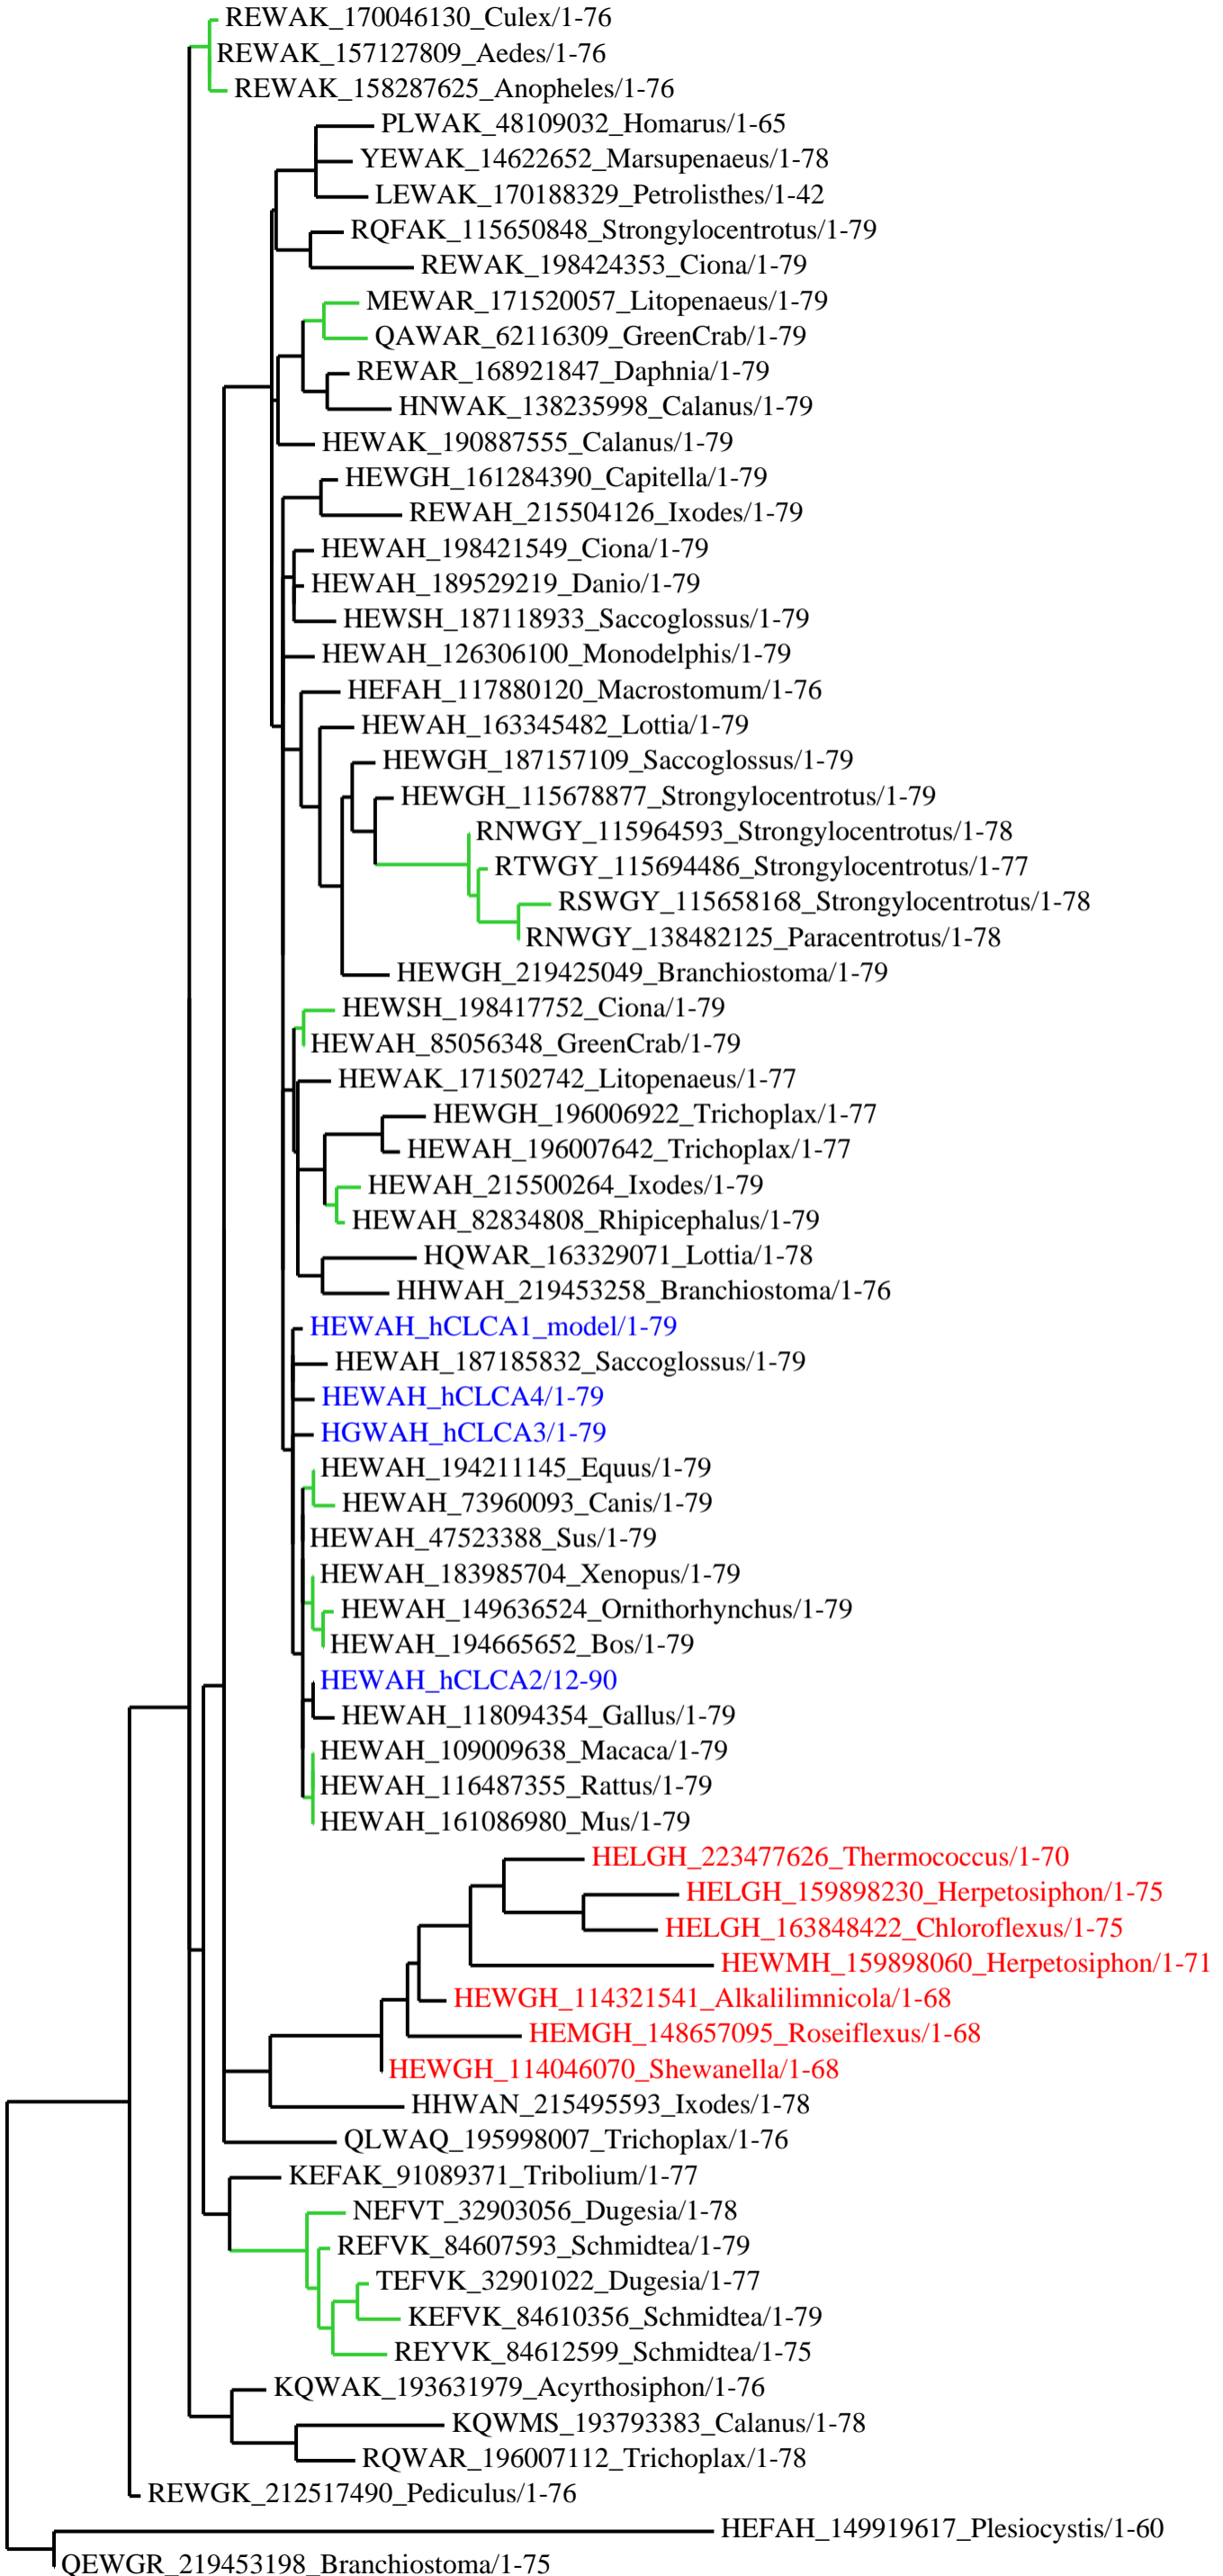

Supplement: pone.0062272.s003.pdf [file pone.0062272.s003.pdf]
