# Supplementary material for: CLCAs - A Family of Metalloproteases of Intriguing Phylogenetic Distribution and with Cases of Substituted Catalytic Sites
Source: PubMed Central journal article supplement (PMC3650047; doi:10.1371/journal.pone.0062272), 2013-05-09
Supplement: pone.0062272.s004.pdf [file pone.0062272.s004.pdf]

|                                                    | 560                   | 570                | 580             | 590                              | 600                  |
|----------------------------------------------------|-----------------------|--------------------|-----------------|----------------------------------|----------------------|
| gi_41179371_Bordetella_phage_V710-A1013            | - - - X ( 1 0 ) - - - | HNARGR -           | I I X ( 0 7 )   | AARR - AD - VR -                 | - - - RQV - AEEVNA   |
| gi_325971694_Sphaerochaeta_globus                  | - - - - -             | - - - - -          | - - - L - - -   | EA - A - AK - AE -               | - - - TST - SKAPQL   |
| gi_338778634_Achromobacter_xylosoxidans_AXXA       | - - - X ( 1 0 ) - - - | SGARSR -           | V I X ( 0 2 )   | - - - - -                        | - - - MQR - EAADRR   |
| gi_329119234_Neisseria_bacilliformis_ATCC_BAA1200  | - - - X ( 0 9 ) - - - | - - - - -          | - - - - -       | - AR - NA - RN -                 | - - - REI - RRLKKE   |
| gi_143390799_marine_metagenome                     | - - - X ( 0 8 ) - - - | - - - - -          | - - - WL - - -  | - - - D - N - A - -              | - - - RSK - YMANLQ   |
| gi_46202268_Magnetospirillum_magnetotacticum_MS1   | - - - X ( 0 8 ) - - - | - - - - -          | - - - X ( 0 7 ) | RDEA - SK - VK -                 | - - - AEV - EAELDQ   |
| gi_260549517_Acinetobacter_sp._RUH2624             | - - - - -             | - - - QKSK -       | Y M - - -       | - - - K - - - - T - -            | - - - LQK - EADKKR   |
| gi_303257573_Burkholderiales_bacterium_1_1_47      | K - TLX ( 0 7 ) - - - | - - - KEIRD -      | K V - - -       | - - - K - - - - E - -            | - - - GVT - AEIEAE   |
| gi_135135168_marine_metagenome                     | - - - X ( 0 9 ) - - - | - - - - -          | - - - X ( 0 6 ) | SALY - RR - LS -                 | - - - EEA - EAEVDA   |
| gi_226940477_Laribacter_hongkongensis_HLHK9        | - - - X ( 0 8 ) - - - | - - - - -          | - - - X ( 0 7 ) | KEAR - QK - VR -                 | - - - SEV - AEEASS   |
| gi_303327648_Desulfovibrio_sp._3_1_syn3            | - - - - -             | - - - KRWKA -      | Y F - - -       | - - - DE - GKEIARG -             | - - - DVF - YEIMAA   |
| gi_260655809_fragm1_Jonquetella_anthropi_E3_33_E1  | E - ETX ( 0 7 ) - - - | - - - EQ -         | L - X ( 0 6 )   | QRQS - RI - AY -                 | - - - EEG - RRAERQ   |
| gi_292670780_Selenomonas_noxia_ATCC_43541          | - - - X ( 0 7 ) - - - | - - - - -          | - - - X ( 0 6 ) | AHME - EY - E -                  | - - - AQL - KAEMRE   |
| gi_42526652_Treponema_denticola_ATCC_35405         | - - - X ( 1 0 ) - - - | - - - KAVEK -      | S EX ( 0 1 )    | NGF - T - RK -                   | - - - EHY - GAVAEI   |
| gi_261365774_Neisseria_mucosa_ATCC_25996           | - - - - -             | - - - - -          | - - - - -       | - - - QY - IN -                  | - - - DMA - PLSDNK   |
| gi_334110301_fragm1_Methylomicrobium_album_BG8     | - - - - -             | - - - - -          | - - - - -       | - - - - -                        | - - - FK - AWLKQV    |
| gi_307545219_Halomonas_elongata_DSM_2581           | - - - - -             | - - - GGS GM T N - | - - - - -       | - - - A - - - - E - -            | - - - AAE - VI ERVA  |
| gi_197935890_Ralstonia_phage_RSB                   | - - - X ( 0 1 ) - - - | - - - KAV - Q -    | I V X ( 0 1 )   | - DL - LG - LT -                 | - - - NLQ - TNALVR   |
| gi_330837124_Spirochaeta_coccoides_DSM_17374       | T - ERX ( 0 3 )       | TVRRTAFKN -        | W F - - -       | - - - GDW - - - - -              | - - - E - TVI PDA    |
| gi_330837385_Spirochaeta_coccoides_DSM_17374       | T - ERX ( 0 3 )       | VTVRTTAFKN -       | W - - - -       | - - - GDW - E - - AA -           | - - - ENF - KWL MNA  |
| gi_290968637_Megasphaera_genomosp._type_1_str._28  | - - - - -             | - - - - -          | - - - X ( 0 5 ) | EDIR - AK - A -                  | - - - KET - VFADML   |
| gi_302339304_Spirochaeta_smaragdinae_DSM_11293     | E - D - - - -         | - - - LRK -        | A Y - - -       | - - - - -                        | - - - D - ALYSLR     |
| gi_54302257_Photo bacterium_profundum_SS9          | - - - X ( 0 8 ) - - - | - - - - -          | - - - X ( 0 7 ) | KDAE - ID - MR -                 | - - - DQV - MAEMAE   |
| gi_334110301_fragm2_Methylomicrobium_album_BG8     | - - - X ( 0 5 ) - - - | - - - SGT LRQ -    | LL X ( 0 2 )    | - - VD - QD - AA -               | - - - DLK - NIDAAT   |
| gi_282848887_Veillonella_parvula_ATCC_17745        | - - - - -             | - - - - -          | - - - - -       | - - - ID - AY - TK -             | - - - EQA - LEQFES   |
| gi_260655809_fragm2_Jonquetella_anthropi_E3_33_E1  | - - - - -             | - - - - -          | - - - - -       | - - - - -                        | - - - T - PEEMDA     |
| gi_223557944_uncultured_bacterium_URE12            | - - - X ( 0 3 ) - - - | - - - - -          | - - - S - - -   | - - - EN - G - TK - LY -         | - - - QAP - YNETGS   |
| gi_137870274_marine_metagenome                     | - - - - -             | - - - - -          | - - - AI - - -  | - - - Q - E - T - -              | - - - QDA - AIDSLT   |
| gi_144016282_marine_metagenome                     | - - - X ( 0 4 ) - - - | - - - DEQSS -      | AAX ( 0 3 )     | AGTQ - Q - K -                   | - - - PKK - SDYRDR   |
| gi_212703236_Desulfovibrio_piger_ATCC_29098        | R - DMX ( 0 3 ) - - - | - - - RRFA G -     | MA - - -        | - - - ED - G - GL - TA -         | - - - EQW - REVQEY   |
| gi_126661473_Cyanothece_sp._CCY0110                | - - - X ( 0 6 ) - - - | - - - TMQMD -      | T L - - -       | - - - G - - - - K -              | - - - KYD - KLTDHG   |
| gi_136020360_marine_metagenome                     | - - - - -             | - - - - -          | - - - - -       | - - - - -                        | - - - EQE - I IQSKH  |
| gi_120556756_Marinobacter_aquaeolei_VT8            | E - QR - - - -        | DRINAA FRT -       | Y F - - -       | - - - HSL - G - - - R - -        | - - - ALQKNGV KH     |
| gi_338997685_Halomonas_sp._TD01                    | E - QR - - - -        | ERINAL FSA -       | Y F - - -       | - - - ASL - G - - - K - -        | - - - AL - - - SKES  |
| gi_152996317_Marinomonas_sp._MWYL1                 | E - QR - - - -        | HRVNKA FHN -       | Y F - - -       | - - - SLL - G - - - - -          | - - - HALK - - - -   |
| gi_88859991_Pseudoalteromonas_tunicata_D2          | V - HQ - - - -        | LKY GACLYD -       | Y F - - -       | - - - SLL - G - - - E - -        | - - - L - - - LESK   |
| gi_163800453_Vibrio_sp._AND4                       | A - HR - - - -        | HAIHQAMQA -        | Y F - - -       | - - - RPL - G - - - D - -        | - - - ALSCK - - - -  |
| gi_315126745_Pseudoalteromonas_sp._SM9913          | N - HT - - - -        | LHANEALNH -        | Y F - - -       | - - - QLL - G - - - Y - -        | - - - - - ALHQ       |
| gi_294142255_Shewanella_violacea_DSS12             | Q - HR - - - -        | QQIFSA LIA -       | Y F - - -       | - - - EPL - - - - -              | - - - - - GDAL       |
| gi_315274348_Enterobacteria_phage_VT2phi_272       | A - ELX ( 0 1 )       | GGI REAFDH -       | LF - - -        | - - - RTL - K - - - TX ( 0 7 ) - | - - - AF - YSRKGV    |
| gi_190606601_Moraxella_bovis_Epp63                 | D - EL - - - -        | EQFSKAYTA -        | V - - -         | - - - - -                        | - - - - - FDTL       |
| gi_228969344_Bacillus_thuringiensis_serovar_sotto  | E - QR - - - -        | EHLNR -            | S I - - -       | - - - - -                        | - - - - - KSL        |
| gi_288561639_Bacillus_pseudofirmus_OF4             | L - ER - - - -        | KQINEAMDV -        | Y I - - -       | - - - - -                        | - - - - - KLL        |
| gi_332304605_Glaciecola_agarilytica_4H37+YE5       | T - HR - - - -        | RTVQDHFLR -        | Y F - - -       | - - - VHL - G - - - Q - -        | - - - AL - - - ESKS  |
| gi_308050931_Ferrimonas_balearica_DSM_9799         | A - HL - - - -        | KRIDLA I RG -      | Y F - - -       | - - - APL - G - - - Q - -        | - - - - - ALSR       |
| gi_221134706_Glaciecola_sp._HTCC2999               | S - HR - - - -        | KCVNEQFAA -        | Y F - - -       | - - - SQL - G - - - H - -        | - - - - - AMGH       |
| gi_142045318_marine_metagenome                     | N - LR - - - -        | TSLNQA LML -       | Y F - - -       | - - - YQL - G - - - V - -        | - - - A - - - ISHK   |
| gi_142806930_marine_metagenome                     | A - LS - - - -        | SVLAQH WLG -       | Y F - - -       | - - - SLL - G - - - - -          | - - - - - RVL R      |
| gi_149376567_Marinobacter_alqicola_DG893           | H - QR - - - -        | QRINDAFEC -        | Y F - - -       | - - - VAL - G - - - G - -        | - - - ALY - REHAE    |
| gi_336450964_Idiomarina_sp._A28L                   | A - LN - - - -        | LQLQKAWLD -        | Y F - - -       | - - - GAL - G - - - N - -        | - - - AL - - - DRQS  |
| gi_260775873_Vibrio_coralliilyticus_ATCC_BAA450    | A - HR - - - -        | QAIYRALHA -        | Y F - - -       | - - - GPL - G - - - Q - -        | - - - - - ALS        |
| gi_119774733_Shewanella_amazonensis_SB2B           | I - HR - - - -        | QAIMKAMAG -        | Y F - - -       | - - - RPL - G - - - R - -        | - - - - - ALAK       |
| gi_88799587_Reinekea_sp._MED297                    | T - HR - - - -        | QTINRAFAQ -        | Y F - - -       | - - - GSL - G - - - A - -        | - - - VL - - - RRQH  |
| gi_142223042_marine_metagenome                     | T - EA - - - -        | QAIDAAFED -        | Y F - - -       | - - - GLL - G - - - Y - -        | - - - - - ALNR       |
| gi_241589636_Ralstonia_pickettii_12D               | E - ER - - - -        | KTINGH FDT -       | LF - - -        | - - - - -                        | - - - - - AGL        |
| gi_281357131_Victivallis_vadensis_ATCC_BAA548      | K - ES - - - -        | AAVRKIFDE -        | FV - - -        | - - - - -                        | - - - - - GTL        |
| gi_138663503_marine_metagenome                     | A - LS - - - -        | DRLSELWLG -        | Y F - - -       | - - - STL - G - - - Q - -        | - - - - - ALQR       |
| gi_126668031_Marinobacter_sp._ELB17                | D - QL - - - -        | KNLDQAFKG -        | LF - - -        | - - - - -                        | - - - - - KTV        |
| gi_325914618_Xanthomonas_vesicatoria_ATCC_35937    | Y - QR - - - -        | QELEKLFSE -        | LL - - -        | - - - - -                        | - - - - - KHV        |
| gi_120536892_Marinobacter_aquaeolei_VT8            | S - EL - - - -        | DRIKDAFNK -        | LF - - -        | - - - - -                        | - - - - - KTL        |
| gi_137191980_marine_metagenome                     | P - VR - - - -        | QRINQAFAC -        | Y F - - -       | - - - SAL - G - - - Q - -        | - - - ALS - PRSDQK   |
| gi_331000123_Parasutterella_excrementihominis_YIT  | V - DV - - - -        | RRVSEK FKA -       | - - -           | - - - - -                        | - - - - - LFE        |
| gi_137344792_marine_metagenome                     | A - LT - - - -        | DTLAAIWLQ -        | Y F - - -       | - - - SLL - G - - - H - -        | - - - GL - - - TNKN  |
| gi_303258118_Burkholderiales_bacterium_1_1_47      | K - DV - - - -        | EKVTNGFKR -        | I F - - -       | - - - KVI - K - - - TX ( 0 7 )   | - - - ALF - SKANQE   |
| gi_134287922_Burkholderia_vietnamiensis_G4         | I - ER - - - -        | RVI GAA I DR -     | Y - - -         | - - - - -                        | - - - - - FET        |
| gi_333369137_Psychrobacter_sp._1501_2011           | E - ER - - - -        | MRINAAFDK -        | L - - -         | - - - - -                        | - - - - - FK         |
| gi_338210739_Runella_slithyformis_DSM_19594        | A - EL - - - -        | EKIAP -            | LF - - -        | - - - - -                        | - - - - - RRF        |
| gi_113970416_Shewanella_sp._MR4                    | P - HR - - - -        | QRIFNALIA -        | Y F - - -       | - - - EPL - G - - - - -          | - - - - - MAL GK     |
| gi_94499259_Oceanobacter_sp._RED65                 | Q - HR - - - -        | VRINYAFKD -        | Y F - - -       | - - - QSL - G - - - Q - -        | - - - AL - - - YRES  |
| gi_114563265_Shewanella_frigidimarina_NCIMB_400    | Q - HC - - - -        | REIYQAMME -        | Y F - - -       | - - - EPL - G - - - L - -        | - - - AFD - KQNGQK   |
| gi_85712065_Idiomarina_baltica_OS145/10-262        | D - EA - - - -        | NAVAECWLD -        | Y F - - -       | - - - QSL - G - - - - -          | - - - - - QALK       |
| gi_51596166_Yersinia_pseudotuberculosis_IP_32953   | A - ELX ( 0 1 )       | GGVRAQFEH -        | LF - - -        | - - - - -                        | - - - - - NTL        |
| gi_269104751_Photo bacterium_damselae_subsp._damse | A - ES - - - -        | KNIRSSF DH -       | LF - - -        | - - - - -                        | - - - - - NTI        |
| gi_87119325_Marinomonas_sp._MED121                 | E - QR - - - -        | QNINLAFNE -        | Y F - - -       | - - - KML - G - - - - -          | - - - - - AY LNS     |
| gi_269138988_Edwardsiella_tarda_EIB202             | Q - ELX ( 0 1 )       | GGI GAA FDT -      | LF - - -        | - - - - -                        | - - - - - STL        |
| gi_51245843_Desulfotalea_psychrophila_LSV54        | D - EL - - - -        | KTVGPAFTD -        | LF - - -        | - - - KTL - K - - - SX ( 0 7 ) - | - - - LL - YSRSSV    |
| gi_319762397_Alicyclophilus_denitrificans_BC       | G - EL - - - -        | PQIREAFDA -        | FF - - -        | - - - - -                        | - - - - - QTV        |
| gi_149915016_Roseobacter_sp._AzK3b                 | K - DM - - - -        | GELRSA -           | - - -           | - - - - -                        | - - - - - FNN        |
| gi_313897977_Clostridium_sp._HGF2                  | E - ER - - - -        | KKINIC FDK -       | LM - - -        | - - - EYL - K - - - - -          | - - - EQG LLH        |
| gi_302668924_Butyrvibrio_proteoclasticus_B316      | E - ER - - - -        | NRINKAFDD -        | LI - - -        | - - - K - - - - -                | - - - - - HLF        |
| gi_193076431_Acinetobacter_baumannii_ATCC_17978    | Q - ER - - - -        | IRIVHYLDR -        | WL - - -        | - - - - -                        | - - - - - SEL        |
| gi_283795255_Clostridium_sp._M62/1                 | E - ER - - - -        | KAINAVFDE -        | VF - - -        | - - - SDL - K - - - - -          | - - - R - QHFLTH     |
| gi_239907128_Desulfovibrio_magneticus_RS1          | A - ER - - - -        | KAINAAFDH -        | FF - - -        | - - - - -                        | - - - - - ATV        |
| gi_319792705_Variovorax_paradoxus_EPS              | D - IR - - - -        | AGLAQALDA -        | R - - -         | - - - - -                        | - - - - - YFK        |
| gi_142771127_marine_metagenome                     | D - EL - - - -        | GVINPAFRA -        | LF - - -        | - - - - -                        | - - - - - DTL        |
| gi_320535744_Treponema_phagedenis_F0421            | - - - - -             | - - - - -          | - - - - -       | - - - - -                        | - - - - - YL         |
| gi_325103603_Pedobacter_saltans_DSM_12145          | - - - - -             | - - - - -          | - - - - -       | - - - - -                        | - - - - - I          |
| gi_335348301_Lactobacillus_salivarius_GJ24         | TDNTX ( 0 1 )         | KKI VNY FDN -      | K - - -         | - - - F - - - - -                | - - - - - PDYR       |
| gi_227891938_Lactobacillus_salivarius_ATCC_11741   | TDDIX ( 0 1 )         | AKITEYFD -         | - - -           | - - - - -                        | - - - - - NKF        |
| gi_240047480_Mycoplasma_conjunctivae_HRC581        | - - - X ( 0 9 ) - - - | - - - KD I KD -    | DFX ( 0 1 )     | KMY - ED - IF -                  | - - - EVK - KKMEFV   |
| gi_307269283_Enterococcus_faecalis_TX4248          | - - - X ( 0 9 ) - - - | - - - - -          | - - - - -       | - - - - -                        | - - - - - FPA        |
| gi_336053407_Lactobacillus_kefiranofaciens_ZW3     | E - A - - - -         | - - - AMSQ -       | V V - - -       | - - - - -                        | - - - - - I - YFDKLF |
| gi_169834814_Clostridium_botulinum_A3_str._Loch_M  | E - QLX ( 0 1 )       | LLIKEY YSS -       | L - - -         | - - - F - - - - -                | - - - - - DIRDKI     |
| gi_168205401_Clostridium_perfringens_E_str._JGS19  | SDKYX ( 0 1 )         | KELTEYFND -        | L - - -         | - - - I - - - - -                | - - - - - NKLDLN     |
| gi_343098022_Paenibacillus_polymyxa_M1             | EKTFX ( 0 1 )         | NLIQSYFNN -        | L - - -         | - - - F - - - - -                | - - - - - FKFVSG     |
| gi_282851885_Lactobacillus_gasserii_2241           | T P DIX ( 0 1 )       | KKISSYFDK -        | Q - - -         | - - - - -                        | - - - - - FPT        |
| gi_229113621_Bacillus_cereus_Rock115               | E - EF - - - -        | - - - MNM I TD -   | Y F - - -       | - - - NWL - - - - -              | - - - L - RKLKAN     |
| gi_228949804_Bacillus_thuringiensis_serovar_monte  | DEEYX ( 0 1 )         | NMVRSYFEK -        | V - - -         | - - - L - - - - -                | - - - - - KNK PIN    |
| gi_196048016_Bacillus_cereus_03BB108               | DEEYX ( 0 1 )         | RAVKLYFDK -        | F - - -         | - - - F - - - - -                | - - - - - LDKDI      |
| gi_210616890_Clostridium_nexile_DSM_1787           | D - ELX ( 0 1 )       | ALIY -             | - - -           | - - - - -                        | - - - - - DYS        |
| gi_322691234_Bifidobacterium_longum_subsp._longum  | - - - - -             | - - - - -          | - - - - -       | - - - - -                        | - - - - - SLLSD      |
| gi_297618189_Syntrophothermus_lipocalidus_DSM_126  | - - - X ( 0 1 ) - - - | - - - STW - E -    | EVX ( 0 1 )     | AKY - AA - RF -                  | - - - EY - FDSLFS    |
| gi_225155137_Diplosphaera_colitermitum_TAV2        | - - - X ( 0 4 ) - - - | - - - AEEF - - -   | - - - - -       | - - - A P I A - E - E -          | - - - IDD - VFRQKG   |
| gi_333996733_Treponema_primitia_ZAS-2              | - - - - -             | - - - - -          | - - - - -       | - - - F - HS - R -               | - - - LYI - RYAKG    |
| gi_258514689_Desulfotomaculum_acetoxidans_DSM_771  | - - - - -             | - - - EG - YV -    | - - - - -       | - - - YHGY - KY - I -            | - - - KHY - ADEHSA   |
| gi_333979014_Desulfotomaculum_kuznetsovii_DSM_611  | - - - - -             | - - - SG - YI -    | - - - - -       | - - - WHGW - E - - -             | - - - YI - RHYAGQ    |
| gi_333979806_Desulfotomaculum_kuznetsovii_DSM_611  | - - - - -             | - - - TG - YA -    | - - - - -       | - - - WHGW - Q - - -             | - - - YI - KACAGG    |
| gi_224369040_Desulfobacterium_autotrophicum_HRM2   | - - - - -             | - - - ED - TT -    | - - - - -       | - - - GNSY - RY - - -            | - - - I KG YAE       |
| gi_227872114_Oribacterium_sinus_F0268              | - - - - -             | - - - - -          | - - - - -       | - - - - -                        | - - - AYVDP          |
| gi_136199725_marine_metagenome                     | - - - - -             | - - - - -          | - - - - -       | - - - GF - - - - -               | - - - EAF - YFFDY    |
| gi_136474110_marine_metagenome                     | - - - - -             | - - - - -          | - - - - -       | - - - GF - - - - -               | - - - EA - FFLRE     |
| gi_136819193_marine_metagenome                     | Q - PV - - - -        | - - - RALQR -      | FF - - -        | - - - N - - - - -                | - - - SVV - NFLRRM   |
| gi_140968715_marine_metagenome                     | K - PL - - - -        | - - - SALRR -      | FG - - -        | - - - N - - - - -                | - - - IIA - NMLRRL   |
